# Supplementary material for: Oxidative cage opening in the C70 fullerene facilitated by preceding trifluoromethylation
Source: Royal Society of Chemistry journal article supplement (doi:10.1039/d3cp05480b), 2024-01-01
Supplement: d3cp05480b1.pdf [file d3cp05480b1.pdf]

Supporting Information for

## Oxidative cage opening in the C<sub>70</sub> fullerene facilitated by preceding trifluoromethylation

Sofia V. Gracheva, Nadezhda B. Tamm, Konstantin A. Lyssenko, Ilya N. Ioffe,  
Natalia S. Lukonina,\* and Alexey A. Goryunkov

### Contents

|                                                                                                                                                                                                    |    |
|----------------------------------------------------------------------------------------------------------------------------------------------------------------------------------------------------|----|
| Reagents and solvents.....                                                                                                                                                                         | 1  |
| Synthetic procedures.....                                                                                                                                                                          | 2  |
| <b>Figure S1.</b> The HPLC trace of the reaction mixture (CB 4.6 mm i.d. × 250 mm, toluene 1 mL·min <sup>-1</sup> ). Isolated fractions of compounds <b>2a</b> and <b>2b</b> are highlighted ..... | 3  |
| <b>Figure S2.</b> The HPLC traces (CB 4.6 mm i.d. × 250 mm, toluene 1 mL·min <sup>-1</sup> ) and the APCI mass spectra of compounds <b>2a</b> and <b>2b</b> .....                                  | 3  |
| <b>Figure S3.</b> The UV-Vis spectra of C <sub>s</sub> -C <sub>70</sub> (CF <sub>3</sub> ) <sub>8</sub> and its derivatives <b>2a</b> and <b>2b</b> .....                                          | 4  |
| Single crystal X-ray analysis.....                                                                                                                                                                 | 4  |
| <b>Table S1.</b> Crystallographic data for compounds <b>2a</b> and <b>2b</b> .....                                                                                                                 | 4  |
| Experimental methods .....                                                                                                                                                                         | 5  |
| Quantum chemical calculations .....                                                                                                                                                                | 6  |
| <b>Figure S4.</b> The mechanism of compounds <b>2a</b> and <b>2b</b> formation from C <sub>s</sub> -C <sub>70</sub> (CF <sub>3</sub> ) <sub>8</sub> (depicted in the Figure 2).<br>.....           | 7  |
| <b>Table S2.</b> Calculated energy levels of intermediates and transitions states (TS) of proposed pathways formation of products <b>2a</b> and <b>2b</b> .....                                    | 9  |
| <b>Figure S5.</b> The LUMO distribution in diketone C <sub>70</sub> (CF <sub>3</sub> ) <sub>8</sub> O <sub>2</sub> ( <b>4</b> ).....                                                               | 9  |
| <b>Atomic coordinates of the optimized structures</b> .....                                                                                                                                        | 10 |
| References:.....                                                                                                                                                                                   | 32 |

### Reagents and solvents

C<sub>70</sub> (Fullerene-center, Russia, 99,8%), CF<sub>3</sub>I (P&M Invest, Russia, 99%), pyridine (Acros Organics, 99+%), 18-crown-6 (Sigma-Aldrich, 99%) were used as received. K<sub>2</sub>CO<sub>3</sub> was dried in vacuo at 120°C for 3 hours.

Toluene (Himed, 99%) was refluxed over Na for 2 h, and then distilled; fraction with b.p. 110.6 °C was collected. Hexane (Himed, 99%) was refluxed over P<sub>2</sub>O<sub>5</sub> for 2 h, and then distilled; fraction with b.p. 69°C was collected.

*o*-Dichlorobenzene (Acros Organics, 99%) was refluxed over CaH<sub>2</sub> for 2 h, and then distilled under reduced pressure (12 mmHg); fraction with b.p. 64°C was collected.

## Synthetic procedures

**Trifluoromethylated fullerene C<sub>5</sub>-C<sub>70</sub>(CF<sub>3</sub>)<sub>8</sub>** was synthesized according to the two-step protocol involving trifluoromethylation of C<sub>70</sub> with CF<sub>3</sub>I at the first stage followed by transalkylation the obtained product with C<sub>70</sub> at the second stage (see refs<sup>1,2</sup>). Isomerically pure trifluoromethylfullerene was isolated by means of preparative HPLC using toluene as an eluent.

**C<sub>5</sub>-C<sub>70</sub>(CF<sub>3</sub>)<sub>8</sub>**: MALDI MS *m/z* (*I*, %): 1392 (M<sup>-</sup>, C<sub>70</sub>(CF<sub>3</sub>)<sub>8</sub><sup>-</sup>, 100%); HPLC (*t<sub>R</sub>*, min, CB 4.6 mm i.d. × 250 mm, toluene 1 mL·min<sup>-1</sup>): 4.6.

**Synthesis of C<sub>70</sub>(CF<sub>3</sub>)<sub>8</sub>(O)O<sub>2</sub> and C<sub>69</sub>O(CF<sub>3</sub>)<sub>8</sub>O**: K<sub>2</sub>CO<sub>3</sub>, pyridine (200 μL) and catalytic amount of 18-crown-6 were added to a solution of C<sub>5</sub>-C<sub>70</sub>(CF<sub>3</sub>)<sub>8</sub> (6.5 mg, 4.7 μmol) in *o*-DCB (10 mL). The reaction mixture was refluxed under air atmosphere for 3 h. Then it was quenched by adding trifluoroacetic acid (300 μl), and filtered through a short plug of silica with toluene as an eluent. Semi-preparative HPLC separation of the reaction mixture using pure toluene as an eluent has yielded fractions with individual C<sub>70</sub>(CF<sub>3</sub>)<sub>8</sub>(O)O<sub>2</sub> (**2a**, major) and C<sub>69</sub>O(CF<sub>3</sub>)<sub>8</sub>O (**2b**, minor). Their yields were estimated by means of the HPLC trace integration (Figure S1). The isolated individual fractions were analyzed with the use of the LC-MS system (Figure S2). The mass spectra of compounds recorded with an APCI (atmospheric pressure chemical ionization) ion source reveal molecular ions and pseudomolecular ions with two additional OH-groups. Such mass spectral pattern is typical for C<sub>5</sub>-C<sub>70</sub>(CF<sub>3</sub>) and its derivatives when an APCI ion source is used.

**C<sub>70</sub>(CF<sub>3</sub>)<sub>8</sub>(O)O<sub>2</sub>**: 30% yield, HPLC (*t<sub>R</sub>*, min, CB 4.6 mm i.d. × 250 mm, toluene, 1 mL·min<sup>-1</sup>): 7.6; APCI MS (negative mode) *m/z* (*I*, %): 1440 (44%, [C<sub>70</sub>(CF<sub>3</sub>)<sub>8</sub>(O)O<sub>2</sub>]<sup>-</sup>), 1474 (100%, [C<sub>70</sub>(CF<sub>3</sub>)<sub>8</sub>(O)O<sub>2</sub>(OH)<sub>2</sub>]<sup>-</sup>); UV (*λ*<sub>max</sub>, nm, cyclohexane): 308, 398, 420, 440.

**C<sub>69</sub>O(CF<sub>3</sub>)<sub>8</sub>O**: 10% yield, HPLC (*t<sub>R</sub>*, min, CB 4.6 mm i.d. × 250 mm, toluene, 1 mL·min<sup>-1</sup>): 6.1; APCI MS (negative mode) *m/z* (*I*, %): 1412 (44%, [C<sub>69</sub>O(CF<sub>3</sub>)<sub>8</sub>O]<sup>-</sup>), 1446 (100%, [C<sub>69</sub>O(CF<sub>3</sub>)<sub>8</sub>O(OH)<sub>2</sub>]<sup>-</sup>); UV (*λ*<sub>max</sub>, nm, cyclohexane): 398, 434, 465.

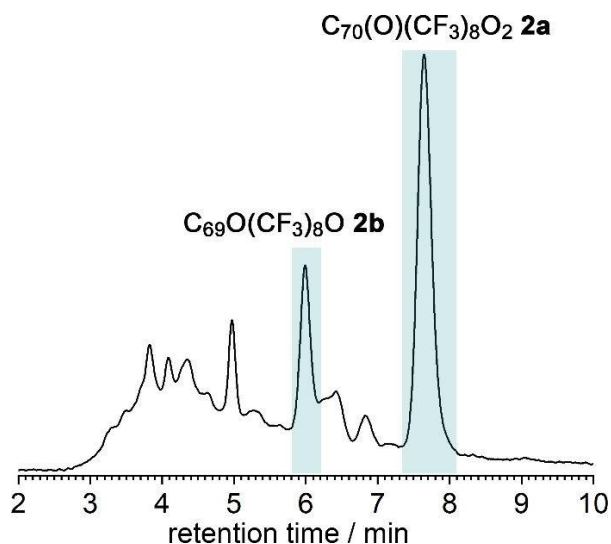

**Figure S1.** The HPLC trace of the reaction mixture (CB 4.6 mm i.d.  $\times$  250 mm, toluene 1 mL $\cdot$ min $^{-1}$ ). Isolated fractions of compounds **2a** and **2b** are highlighted.

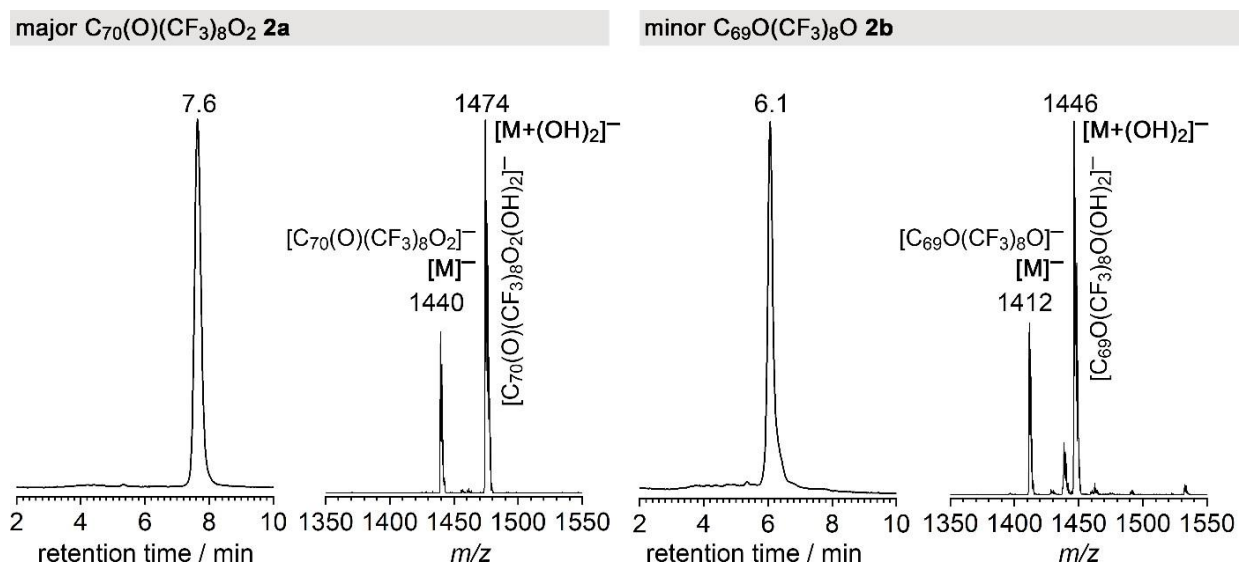

**Figure S2.** The HPLC traces (CB 4.6 mm i.d.  $\times$  250 mm, toluene 1 mL $\cdot$ min $^{-1}$ ) and the APCI mass spectra of compounds **2a** and **2b**.

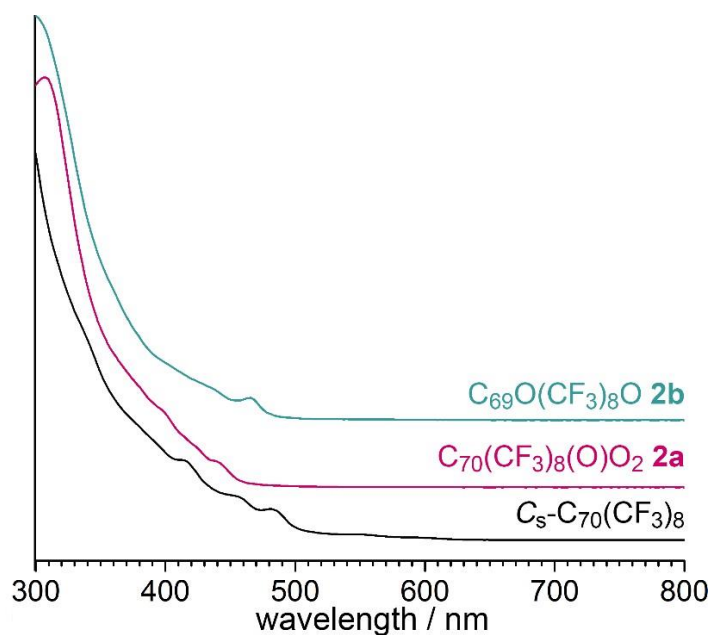

**Figure S3.** The UV-Vis spectra of  $C_5$ - $C_{70}(CF_3)_8$  and its derivatives **2a** and **2b**.

### Single crystal X-ray analysis

Single crystals of compounds **2a** and **2b** were obtained via slow evaporation of toluene from HPLC-isolated fractions. They were investigated with a Bruker D8 QUEST single-crystal X-ray diffractometer equipped with PHOTON II detector, charge-integrating pixel array detector (CPAD), laterally graded multilayer (Goebel) mirror and microfocus Mo-target X-ray tube ( $\lambda = 0.73071 \text{ \AA}$ ). Data reduction and integration were performed with the Bruker software package SAINT (Version 8.40B).<sup>3</sup> The data were corrected for Lorentz and polarization effects. The absorption correction was performed using multiscan routine as implemented in SADABS (Version 2016/2).<sup>4</sup> Crystal structure solution and refinement were performed using SHELX-2018 package.<sup>5</sup> Atomic positions were located using dual method and refined using a combination of Fourier synthesis and least-square refinement in isotropic and anisotropic approximations. The contribution of strongly disordered toluene molecule for the structural amplitudes in **2a** were excluded by the SQUEEZE method in the PLATON program,<sup>6</sup> which substantially improved the model. The analysis of Fourier synthesis has revealed that in **2b** the oxygen atoms are disordered over two positions with occupancies 0.26 and 0.74. Upon refinement, the EADP and EXYZ routines (for atom in the fullerene fragment) were used. An additional epoxy oxygen was found at one of the poles in **2b** with the occupancy 0.21 (apparently, this additional oxidation occurred in the course of crystal growth). Crystallographic parameters and final residuals for the single-crystal XRD experiment are given in Table S1.

**Table S1.** Crystallographic data for compounds **2a** and **2b**.

|         | Compound <b>2a</b>   | Compound <b>2b</b>        |
|---------|----------------------|---------------------------|
| Formula | $C_{85}H_8F_{24}O_3$ | $C_{84}H_8F_{24}O_{2.21}$ |

|                                                                                        |                         |                         |
|----------------------------------------------------------------------------------------|-------------------------|-------------------------|
| FW                                                                                     | 1532.91                 | 1508.22                 |
| <i>T</i> , K                                                                           | 100                     | 120                     |
| Crystal system                                                                         | Monoclinic              | Monoclinic              |
| Space group                                                                            | <i>P2<sub>1</sub>/c</i> | <i>P2<sub>1</sub>/c</i> |
| <i>Z</i> ( <i>Z'</i> )                                                                 | 4(1)                    | 4(1)                    |
| <i>a</i> , Å                                                                           | 11.2201(4)              | 20.2976(7)              |
| <i>b</i> , Å                                                                           | 22.3582(8)              | 18.2848(7)              |
| <i>c</i> , Å                                                                           | 21.7383(8)              | 14.2099(5)              |
| $\beta$ , °                                                                            | 101.3429(12)            | 99.129(2)               |
| <i>V</i> , Å <sup>3</sup>                                                              | 5346.8(3)               | 5207.0(3)               |
| <i>d</i> <sub>calc</sub> , g·cm <sup>-3</sup>                                          | 1.904                   | 1.924                   |
| $\mu$ , cm <sup>-1</sup>                                                               | 1.73                    | 1.75                    |
| F(000)                                                                                 | 3032                    | 2983                    |
| 2 $\theta$ <sub>max</sub> , °                                                          | 60                      | 52                      |
| Measured refl.                                                                         | 57312                   | 43812                   |
| Independent refl.                                                                      | 15671                   | 9679                    |
| Observed refl.                                                                         | 9166                    | 5048                    |
| Parameters                                                                             | 946                     | 1025                    |
| <i>R</i> <sub>1</sub> for observed refl.                                               | 0.0693                  | 0.0823                  |
| <i>wR</i> <sub>2</sub> for all refl.                                                   | 0.1847                  | 0.2057                  |
| GOF                                                                                    | 0.970                   | 1.033                   |
| Peak and hole, e·Å <sup>-3</sup> ( <i>d</i> <sub>min</sub> / <i>d</i> <sub>max</sub> ) | 0.535/−0.350            | 0.603/−0.562            |

## Experimental methods

**High-Performance Liquid Chromatography–Mass spectrometry.** Analyses of samples were performed using LC-MS system equipped with Agilent 1100 (diode array detector operated at 190–950 nm), a Cosmosil Buckyprep column (4.6 mm i.d. × 250 mm) at 23°C, mass-selective 6410 Triple Quadrupole LC/MS detector (Agilent Technologies, Inc.), and the APCI (Atmospheric Pressure Chemical Ionization) ion source. Isolation of the compounds was performed using Waters Breeze series system (UV/vis  $\lambda$ 2 detector operated at 190–700 nm) equipped with a Cosmosil Buckyprep semi-preparative column (10 mm i.d. × 250 mm) at 25°C. Toluene was used as an eluent.

**Fluorescence spectroscopy.** Absorption and emission spectra were recorded using ULS2048x64TEC SensLine fiber-optic spectrometer equipped with AvaLight-DHc light source (200–2500 nm range,

deuterium and halogen lamps). Spectrometer working range is 190–1100 nm. Optical resolution is 0.04 nm. Samples were measured at the 355 nm excitation using light-emitting diode source AvaLight-LED355 (FWHM=10 nm). Fluorescence quantum yields were determined by the relative method with respect to the quinine sulfate reference (QS ( $\geq 98\%$ , BioReagent, Sigma-Aldrich) in 0.5M H<sub>2</sub>SO<sub>4</sub> ( $\Phi_F$  0.546)).<sup>7</sup> For each sample, 5–10 measurements with various concentrations of analyte were performed. The absorbance remained within 0.1 arb. units at the excitation wavelength (355 nm) for all samples. The resulting  $\Phi_F$  value was obtained from a linear approximation of the integral fluorescence and absorption data from all measurements according to the equation:<sup>8</sup>

$$\Phi_{sm} = \Phi_{ref} \cdot \frac{F_{sm}}{F_{ref}} \cdot \frac{A_{ref}}{A_{sm}} \cdot \frac{n_{ref}^2}{n_{sm}^2}$$

where *sm* denotes sample and *ref* – the reference; *F* is the relative integral photon flux for spectrally corrected and blank-corrected spectra; *A* is integral absorbance in the range of 355±0.5 nm; *n* is refractive index of the solvent. In the equation, we used *A* instead of the absorption factor *f* since it offers a good approximation for very dilute solutions.<sup>9</sup>

## Quantum chemical calculations

Optimization of the stable structures and transition states, as well as verification of the latter by means of the IRC tracking were carried out at the DFT level of the theory using of the PRIRODA v.6 software that features an efficient RI approximation.<sup>10</sup> PBE exchange-correlation functional<sup>11</sup> and a built-in valence- and core-split augmented basis set L22a with contraction scheme (13s,9p,6d,3f)/[7s,6p,4d,2f] for the first-row atoms were used. The vibrational calculations and the respective geometry optimizations employed a reduced TZ2p basis set with contraction scheme (10s,3p,3d,1f)/[6s,3p,2d] for the first-row atoms. To our experience, the two basis sets give only marginal differences in vibrational calculations, and the PBE xc functional does not require frequency scaling. In the transition state structures below, the imaginary frequency and the respective mode are given. Because of the condensed-phase conditions, the free energy values presented below exclude the translational contributions.

Due to the compatibility issues of the visualization software, the molecular orbitals were recalculated at the PBE/Def2-TZVPP level using the ORCA software,<sup>12</sup> v. 5.0.4.

DFT is known to systematically overestimates the triplet-singlet gap in O<sub>2</sub> by 50-60 kJ mol<sup>-1</sup>, and our tests reveal that the thermochemistry of simple reactions with oxygen is better reproduced with the singlet O<sub>2</sub> taken as the computational reference and the triplet O<sub>2</sub> placed 94 kJ mol<sup>-1</sup> below, in accordance with the well-known experimental triplet-singlet gap in O<sub>2</sub>. Therefore, the data for the Path A below are calculated with respect to the (**1** + singlet O<sub>2</sub>) effective transition state denoted below as **T-S**(<sup>1</sup>O<sub>2</sub>) whose energy is set at +94 kJ mol<sup>-1</sup>, and the energy of the starting (**1** + triplet O<sub>2</sub>) system is taken to be zero.

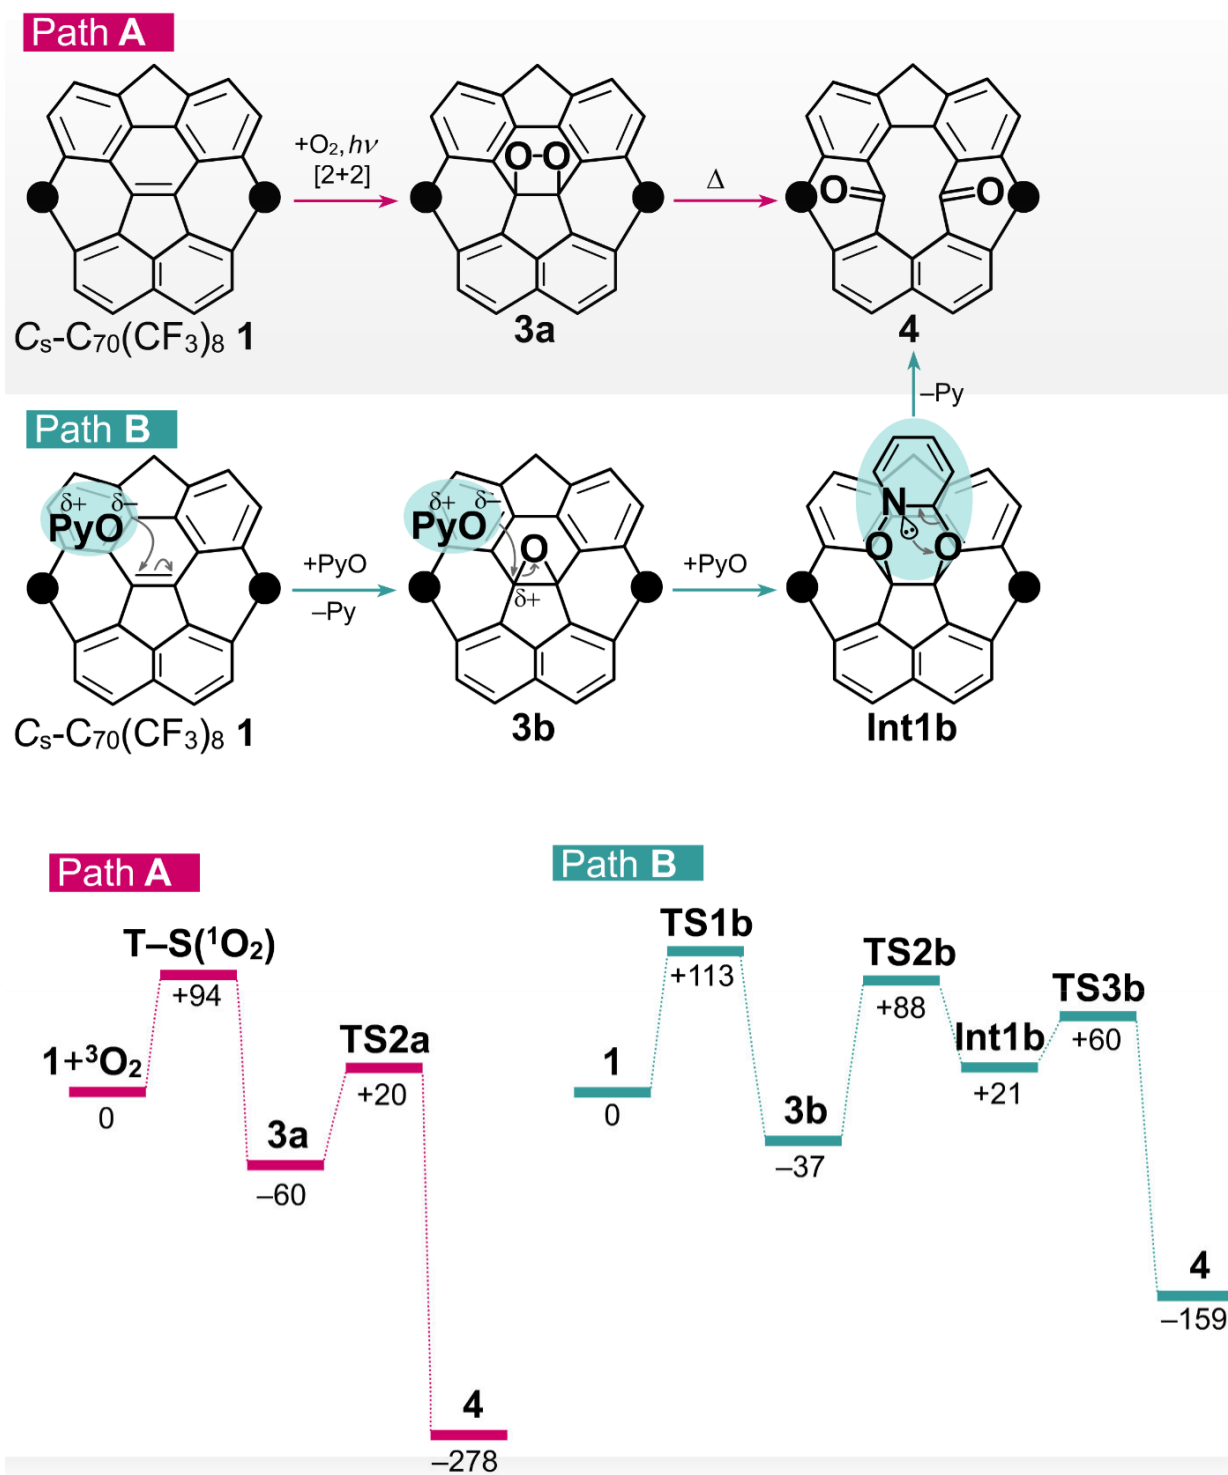

**Figure S4.** The mechanism of compounds **2a** and **2b** formation from  $C_S-C_{70}(CF_3)_8$  (depicted in the Figure 2).

### Path C

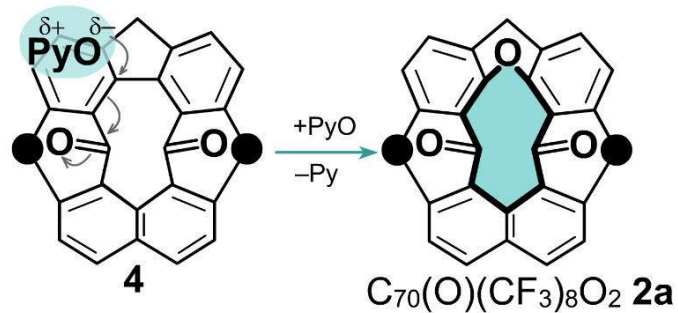

### Path D

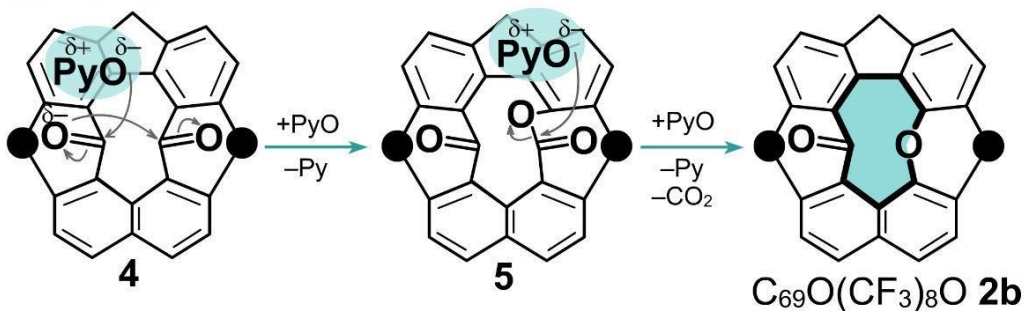

### Path C

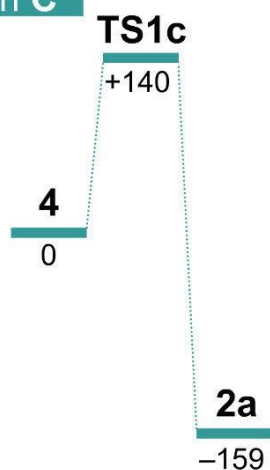

### Path D

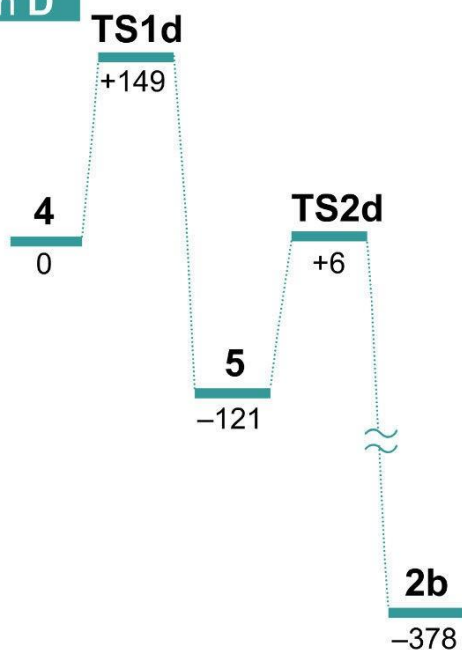

**Figure S4 (continuation).** The mechanism of compounds **2a** and **2b** formation from  $C_5$ - $C_{70}(CF_3)_8$  (depicted in the Figure 2). The potential energy profile between intermediate **5** and product **2b** is actually more complex, with extra saddle points separated from each other by very shallow (some  $10 \text{ kJ mol}^{-1}$ ) local minima. Here we provide the data for the highest of the saddle points.



**Table S2.** Calculated energy levels of intermediates and transitions states (TS) of proposed pathways formation of products **2a** and **2b**.

| Process                               | Electronic energy + ZPVE<br>$\Delta E$ (0 K), kJ mol <sup>-1</sup> | Free energy $\Delta G$ (453 K), kJ mol <sup>-1</sup> | Process       | Electronic energy + ZPVE<br>$\Delta E$ (0 K), kJ mol <sup>-1</sup> | Free energy $\Delta G$ (453 K), kJ mol <sup>-1</sup> |
|---------------------------------------|--------------------------------------------------------------------|------------------------------------------------------|---------------|--------------------------------------------------------------------|------------------------------------------------------|
| <b>Path A</b>                         |                                                                    |                                                      | <b>Path C</b> |                                                                    |                                                      |
| <b>1+<sup>3</sup>O<sub>2</sub></b>    | 0                                                                  | 0                                                    | <b>4</b>      | 0                                                                  | 0                                                    |
| <b>T-S(<sup>1</sup>O<sub>2</sub>)</b> | 94                                                                 | 94                                                   | <b>TS1c</b>   | 132                                                                | 140                                                  |
| <b>3a</b>                             | -71                                                                | -60                                                  | <b>2a</b>     | -161                                                               | -159                                                 |
| <b>TS2a</b>                           | 12                                                                 | 20                                                   | <b>Path D</b> |                                                                    |                                                      |
| <b>4</b>                              | -280                                                               | -278                                                 | <b>4</b>      | 0                                                                  | 0                                                    |
| <b>Path B</b>                         |                                                                    |                                                      | <b>TS1d</b>   | 137                                                                | 149                                                  |
| <b>1</b>                              | 0                                                                  | 0                                                    | <b>5</b>      | -123                                                               | -121                                                 |
| <b>TS1b</b>                           | 105                                                                | 113                                                  | <b>TS2d</b>   | -5                                                                 | 6                                                    |
| <b>3b</b>                             | -39                                                                | -37                                                  | <b>2b</b>     | -372                                                               | -378                                                 |
| <b>TS2b</b>                           | 80                                                                 | 88                                                   |               |                                                                    |                                                      |
| <b>Int1b</b>                          | 1                                                                  | 21                                                   |               |                                                                    |                                                      |
| <b>TS3b</b>                           | 47                                                                 | 60                                                   |               |                                                                    |                                                      |
| <b>4</b>                              | -153                                                               | -159                                                 |               |                                                                    |                                                      |

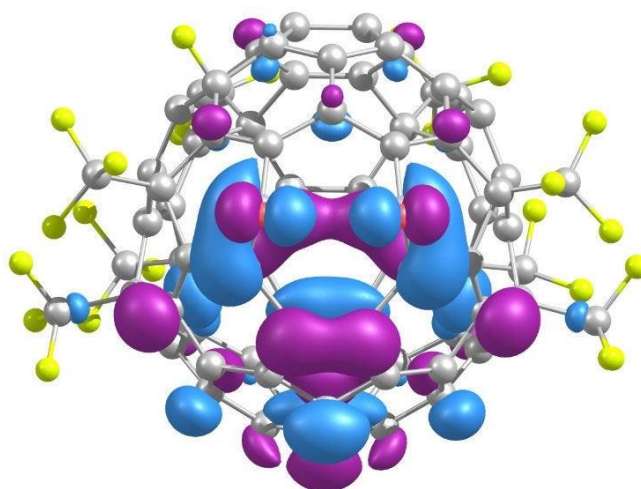

**Figure S5.** The LUMO distribution in diketone C<sub>70</sub>(CF<sub>3</sub>)<sub>8</sub>O<sub>2</sub> (**4**).

## Atomic coordinates of the optimized structures

**Compound 1,  $C_{5-C70}(CF_3)_8$**

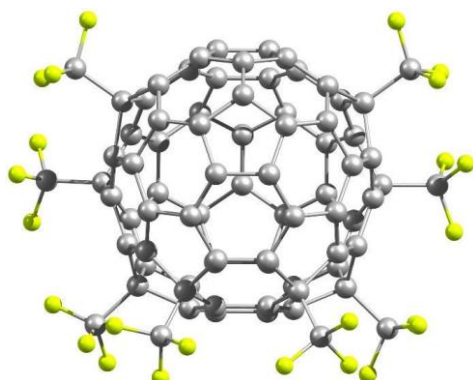

| N | X           | Y           | Z           | N | X           | Y           | Z           |
|---|-------------|-------------|-------------|---|-------------|-------------|-------------|
| 9 | -4.1112727  | -2.898636   | -3.08027288 | 6 | -1.63008141 | -2.5719675  | -1.55734964 |
| 9 | -3.92782692 | -0.95604293 | -4.08536171 | 6 | -2.33137764 | -2.78901838 | -0.3482791  |
| 9 | -2.48520831 | -2.5403536  | -4.5027493  | 6 | -1.67443769 | -3.34586928 | 0.75817956  |
| 9 | 1.65326964  | -3.91022797 | -4.32276004 | 6 | -2.00120418 | -2.88411276 | 2.08980788  |
| 9 | 0.18834771  | -2.60708305 | -5.26966987 | 6 | -2.98284869 | -1.90186922 | 2.28270644  |
| 9 | -0.47297217 | -4.2907635  | -4.02069816 | 6 | -2.73159762 | -0.83898958 | 3.22447976  |
| 9 | 1.74000074  | -5.95980005 | -0.11423271 | 6 | -3.2402766  | 0.38563395  | 2.65796449  |
| 9 | 2.36143785  | -5.26157347 | -2.07858136 | 6 | -2.50132851 | 1.56608289  | 2.82009432  |
| 9 | 3.75054501  | -5.12310457 | -0.38668049 | 6 | -2.32826654 | 2.47974248  | 1.71205074  |
| 9 | 0.60171948  | -4.81947369 | 4.16532889  | 6 | -2.89198985 | 2.17566856  | 0.4653787   |
| 9 | -0.55831864 | -5.83408464 | 2.59930994  | 6 | -2.20249677 | 2.50675418  | -0.72435462 |
| 9 | 1.62343474  | -5.67017645 | 2.44205561  | 6 | -2.69464669 | 1.56597557  | -1.86416396 |
| 9 | -1.76105384 | 4.34849116  | 4.34885813  | 6 | -1.47565817 | 0.99329909  | -2.5867733  |
| 9 | 0.31714805  | 4.9263257   | 3.96322841  | 6 | -1.31086808 | -0.42219002 | -2.8158205  |
| 9 | -0.12149192 | 3.37545405  | 5.43942214  | 6 | -0.06056765 | -0.92561034 | -3.17120323 |
| 9 | 0.21291141  | 6.00349274  | 1.48616921  | 6 | 0.47507523  | -2.35551871 | -2.86789302 |
| 9 | 1.67467969  | 6.02139623  | -0.13252628 | 6 | -0.28324488 | -2.91873175 | -1.66423225 |
| 9 | 2.33074435  | 5.59675085  | 1.90387591  | 6 | 0.39631703  | -3.48474101 | -0.52161151 |
| 9 | -1.75382695 | 4.55985925  | -3.1144112  | 6 | -0.30202757 | -3.68758238 | 0.67007608  |
| 9 | 0.25136867  | 4.39083626  | -3.98148384 | 6 | 0.31275705  | -3.6405985  | 2.09856764  |
| 9 | -0.07086538 | 5.56237158  | -2.15473914 | 6 | -0.79454267 | -2.88896226 | 2.85038401  |
| 9 | -4.81754608 | 1.44543336  | -3.04043644 | 6 | -0.53824089 | -1.85490574 | 3.72353769  |
| 9 | -4.21319167 | 3.40916852  | -2.31160276 | 6 | -1.51583217 | -0.81721757 | 3.92875406  |
| 9 | -3.21367852 | 2.51782922  | -4.05460568 | 6 | -0.79331598 | 0.41810029  | 4.09834904  |
| 6 | -3.33707549 | -1.77039628 | -0.15815063 | 6 | -1.29901845 | 1.59474158  | 3.58964511  |
| 6 | -3.6617187  | -1.33302297 | 1.12921771  | 6 | -0.40848217 | 2.7621528   | 3.14310915  |
| 6 | -3.82030562 | 0.07665401  | 1.36046221  | 6 | -1.06682421 | 3.11965677  | 1.78418651  |
| 6 | -3.64739109 | 0.95810799  | 0.28905317  | 6 | -0.38245819 | 3.46763355  | 0.61961825  |
| 6 | -3.39484283 | 0.48507544  | -1.04103732 | 6 | -0.96787361 | 3.15066049  | -0.66295785 |
| 6 | -3.24354059 | -0.8579213  | -1.26117211 | 6 | -0.14956484 | 3.17146368  | -1.95088289 |
| 6 | -2.34522545 | -1.44267076 | -2.35012713 | 6 | -0.37452777 | 1.83997123  | -2.72026055 |
|   |             |             |             | 6 | 0.88360153  | 1.32024269  | -3.09833789 |
|   |             |             |             | 6 | 1.03911436  | -0.05270077 | -3.32491089 |
|   |             |             |             | 6 | 2.2649057   | -0.71519663 | -2.9406346  |
|   |             |             |             | 6 | 1.9224334   | -2.03052139 | -2.49463823 |
|   |             |             |             | 6 | 2.57285156  | -2.56879225 | -1.41347757 |
|   |             |             |             | 6 | 1.9221348   | -3.55751134 | -0.44424806 |
|   |             |             |             | 6 | 2.4024532   | -2.97208012 | 0.91536833  |
|   |             |             |             | 6 | 1.62566607  | -2.86315738 | 2.05817814  |
|   |             |             |             | 6 | 1.86636315  | -1.76814133 | 2.98616977  |
|   |             |             |             | 6 | 0.79539109  | -1.25591031 | 3.78694841  |
|   |             |             |             | 6 | 0.63983786  | 0.13098886  | 4.01558503  |

**Compound 3a, C<sub>s</sub>-C<sub>70</sub>(CF<sub>3</sub>)<sub>8</sub>(O<sub>2</sub>)**

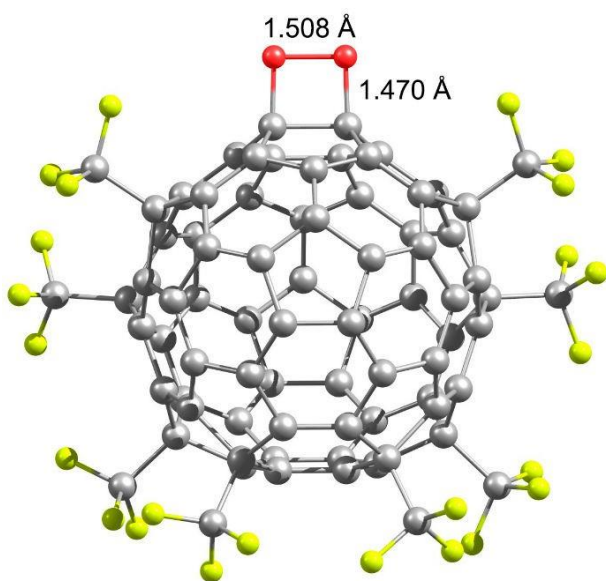

| N | X           | Y           | Z          |
|---|-------------|-------------|------------|
| 6 | -1.19815254 | 0.62289438  | 3.73405481 |
| 6 | -0.02754054 | 1.37941443  | 3.60435253 |
| 6 | 1.24321096  | 0.67200087  | 3.9860777  |
| 6 | 1.24577569  | -0.91400776 | 3.93667412 |
| 6 | -0.02254634 | -1.59791863 | 3.51028077 |
| 6 | -1.19544863 | -0.85466636 | 3.68747062 |
| 6 | -2.41611776 | -1.26110693 | 3.07354782 |
| 6 | -3.19458397 | -0.08826696 | 2.74455611 |
| 6 | -2.42026878 | 1.06454476  | 3.14776734 |
| 6 | -2.41367564 | 2.21779599  | 2.34815328 |
| 6 | -1.22371759 | 2.97340926  | 2.17568788 |
| 6 | -0.04269804 | 2.56863608  | 2.80085567 |
| 6 | 1.25384077  | 3.20775104  | 2.32327865 |
| 6 | 2.41928891  | 2.21597641  | 2.37039358 |
| 6 | 2.41623766  | 1.07911113  | 3.14211554 |
| 6 | 3.14669007  | -0.07950417 | 2.712693   |
| 6 | 2.42059533  | -1.26594534 | 3.0693648  |
| 6 | 2.42837456  | -2.3528237  | 2.22799542 |
| 6 | 1.26244513  | -3.33744141 | 2.10959604 |
| 6 | -0.0338546  | -2.7316897  | 2.63006281 |
| 6 | -1.21193786 | -3.09388163 | 1.97890457 |
| 6 | -2.40560327 | -2.3600908  | 2.20180406 |
| 6 | -3.19821621 | -2.33304351 | 0.99483854 |
| 6 | -3.96999384 | -1.20192001 | 0.68926473 |
| 6 | -3.95890136 | -0.05379095 | 1.57988014 |
| 6 | -3.97395831 | 1.14766118  | 0.76377726 |
| 6 | -3.20361574 | 2.25867381  | 1.13972085 |
| 6 | -2.48615731 | 3.03271924  | 0.17249742 |

| N | X           | Y           | Z           |
|---|-------------|-------------|-------------|
| 6 | -1.31205578 | 3.75633911  | 0.83510617  |
| 6 | -0.019426   | 3.55225139  | 0.04598409  |
| 6 | 1.16001067  | 3.46071021  | 0.78916545  |
| 6 | 2.3436105   | 2.97604922  | 0.18065031  |
| 6 | 3.13739712  | 2.23891725  | 1.13765258  |
| 6 | 3.91400888  | 1.15047042  | 0.72729613  |
| 6 | 3.9198827   | -0.04026683 | 1.53541954  |
| 6 | 3.91789569  | -1.17715878 | 0.6531262   |
| 6 | 3.14466935  | -2.2916737  | 0.99379957  |
| 6 | 2.35136985  | -2.9649176  | -0.00931127 |
| 6 | 1.16907297  | -3.48965509 | 0.56631774  |
| 6 | -0.01069356 | -3.54616255 | -0.17769754 |
| 6 | -1.30337341 | -3.80636395 | 0.60080498  |
| 6 | -2.4778124  | -3.04550315 | -0.01797267 |
| 6 | -2.4817112  | -2.5741315  | -1.30735585 |
| 6 | -3.20305453 | -1.37761901 | -1.61919921 |
| 6 | -3.97412131 | -0.71131489 | -0.66079875 |
| 6 | -3.97627613 | 0.74222853  | -0.61434705 |
| 6 | -3.21011748 | 1.47031856  | -1.53040588 |
| 6 | -2.4893647  | 2.64380939  | -1.14326421 |
| 6 | -1.32867424 | 2.89320028  | -2.10784228 |
| 6 | -0.02913862 | 3.14821259  | -1.34122266 |
| 6 | 1.14263872  | 2.66091602  | -1.92086205 |
| 6 | 2.33400911  | 2.57938067  | -1.16369089 |
| 6 | 3.12781821  | 1.45035217  | -1.59328073 |
| 6 | 3.9101276   | 0.74888028  | -0.66863268 |
| 6 | 3.91244914  | -0.68702882 | -0.71441712 |
| 6 | 3.13519982  | -1.33189689 | -1.68377437 |
| 6 | 2.34365881  | -2.48711608 | -1.32648495 |
| 6 | 1.1518231   | -2.5222513  | -2.08635211 |
| 6 | -0.01517412 | -3.04852457 | -1.53438005 |
| 6 | -1.31265874 | -2.74723577 | -2.27962978 |
| 6 | -1.23027209 | -1.31980578 | -2.88960059 |
| 6 | -2.4161057  | -0.62180695 | -2.56528808 |
| 6 | -2.41993893 | 0.77821189  | -2.52162756 |
| 6 | -1.23611468 | 1.49967289  | -2.79649357 |
| 6 | -0.06566904 | 0.82272195  | -3.1324404  |
| 6 | 1.22498503  | 1.63514649  | -3.08561428 |
| 6 | 2.40192286  | 0.77561539  | -2.62445837 |
| 6 | 2.40424828  | -0.59660297 | -2.66826557 |
| 6 | 1.23613397  | -1.43085243 | -3.19495457 |
| 6 | -0.05988199 | -0.62073116 | -3.18363678 |
| 6 | 1.6371649   | 4.43744407  | 3.21287981  |
| 9 | 2.11540431  | 4.0009425   | 4.4111081   |
| 9 | 2.60947332  | 5.17799889  | 2.62299386  |

| N | X           | Y           | Z           | N | X           | Y           | Z           |
|---|-------------|-------------|-------------|---|-------------|-------------|-------------|
| 9 | 0.59235654  | 5.24832732  | 3.48269636  | 6 | -1.65762597 | -3.8443031  | -3.33137662 |
| 6 | 1.62644376  | -4.64059923 | 2.88288967  | 9 | -1.88203313 | -5.03647731 | -2.72614193 |
| 9 | 1.92907903  | -4.34259656 | 4.17493917  | 9 | -2.77918493 | -3.51073958 | -4.02206273 |
| 9 | 0.6122052   | -5.53424865 | 2.90148649  | 9 | -0.65996669 | -4.02843887 | -4.22538955 |
| 9 | 2.70875593  | -5.24691132 | 2.33160644  | 6 | 1.56116865  | 2.28582487  | -4.46080948 |
| 6 | -1.66176512 | 5.27342064  | 0.9886328   | 9 | 0.57160073  | 3.09401335  | -4.9027028  |
| 9 | -2.62691901 | 5.45235209  | 1.92670146  | 9 | 2.69611538  | 3.02769288  | -4.37691892 |
| 9 | -0.59348638 | 6.02530066  | 1.33302237  | 9 | 1.75688839  | 1.33112483  | -5.40452659 |
| 9 | -2.12963996 | 5.76984975  | -0.18575271 | 6 | 1.60366957  | -2.01081358 | -4.62431836 |
| 6 | -1.65655921 | -5.3434035  | 0.7261571   | 9 | 2.04954662  | -3.28976963 | -4.5314651  |
| 9 | -0.57339812 | -6.13400348 | 0.54675182  | 9 | 0.55261072  | -1.98620164 | -5.47514494 |
| 9 | -2.18641815 | -5.61989514 | 1.94609166  | 9 | 2.59981551  | -1.29007194 | -5.20175257 |
| 9 | -2.57967477 | -5.71282967 | -0.19714451 | 8 | 1.48239641  | -0.91974271 | 5.38708469  |
| 6 | -1.71171318 | 4.0580049   | -3.1158662  | 8 | 1.48022721  | 0.58797331  | 5.43415172  |
| 9 | -2.7500155  | 4.79433108  | -2.64357951 |   |             |             |             |
| 9 | -0.68221793 | 4.91015186  | -3.32706265 |   |             |             |             |
| 9 | -2.10507261 | 3.55701725  | -4.31486528 |   |             |             |             |

Transition state TS2a, C<sub>70</sub>(CF<sub>3</sub>)<sub>8</sub>(O...O)

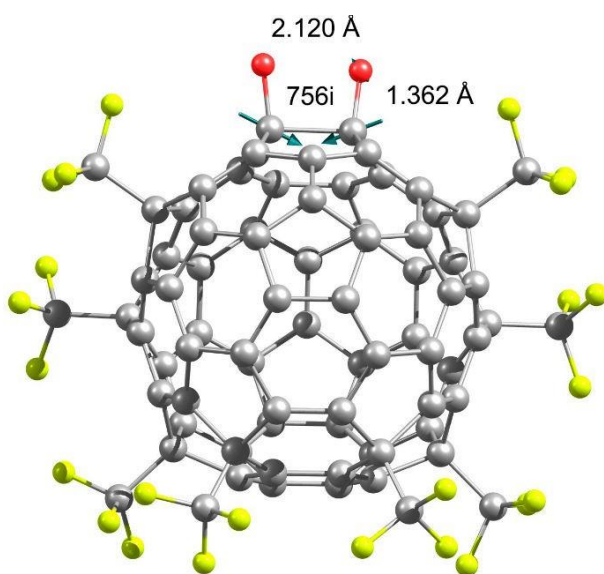

| N | X           | Y           | Z          | N | X           | Y           | Z           |
|---|-------------|-------------|------------|---|-------------|-------------|-------------|
| 6 | -1.19864878 | 0.63306184  | 3.73296475 | 6 | -1.23064103 | 2.98718623  | 2.16820956  |
| 6 | -0.03237716 | 1.39617236  | 3.58637037 | 6 | -0.05173258 | 2.58259944  | 2.78878014  |
| 6 | 1.2239309   | 0.7424742   | 4.07431982 | 6 | 1.25188956  | 3.20778445  | 2.3281385   |
| 6 | 1.31650345  | -1.01895928 | 4.0135117  | 6 | 2.40473822  | 2.19532465  | 2.3874332   |
| 6 | -0.01100871 | -1.59760736 | 3.53771825 | 6 | 2.41560578  | 1.06266554  | 3.17804504  |
| 6 | -1.18222388 | -0.84342183 | 3.69522044 | 6 | 3.13915376  | -0.09450411 | 2.72511241  |
| 6 | -2.40305754 | -1.25230459 | 3.07461237 | 6 | 2.4239276   | -1.29179035 | 3.05396002  |
| 6 | -3.18858572 | -0.08415457 | 2.74350325 | 6 | 2.43649773  | -2.37256818 | 2.20908611  |
| 6 | -2.41958947 | 1.07055494  | 3.14406643 | 6 | 1.26604167  | -3.34717981 | 2.10302926  |
| 6 | -2.41826615 | 2.22459351  | 2.34371216 | 6 | -0.02238725 | -2.72462463 | 2.63570571  |
|   |             |             |            | 6 | -1.19969789 | -3.07880682 | 1.9779643   |
|   |             |             |            | 6 | -2.39574857 | -2.3495912  | 2.20348264  |
|   |             |             |            | 6 | -3.19169103 | -2.32607687 | 0.99844957  |
|   |             |             |            | 6 | -3.96761113 | -1.19829676 | 0.6913635   |
|   |             |             |            | 6 | -3.95668347 | -0.05087715 | 1.58069013  |
|   |             |             |            | 6 | -3.97520895 | 1.15021585  | 0.76348316  |
|   |             |             |            | 6 | -3.20729866 | 2.26436237  | 1.13769796  |
|   |             |             |            | 6 | -2.49023263 | 3.03949788  | 0.16883384  |
|   |             |             |            | 6 | -1.31744636 | 3.76718328  | 0.82962052  |
|   |             |             |            | 6 | -0.02043873 | 3.55737972  | 0.04720443  |
|   |             |             |            | 6 | 1.15802793  | 3.45941108  | 0.79414011  |
|   |             |             |            | 6 | 2.33717371  | 2.9644549   | 0.19049127  |
|   |             |             |            | 6 | 3.11819504  | 2.2169284   | 1.14952685  |
|   |             |             |            | 6 | 3.90305114  | 1.13860639  | 0.7359934   |
|   |             |             |            | 6 | 3.90953588  | -0.05056104 | 1.5417951   |
|   |             |             |            | 6 | 3.91462006  | -1.18318853 | 0.65149487  |
|   |             |             |            | 6 | 3.14760249  | -2.30682831 | 0.98046932  |
|   |             |             |            | 6 | 2.35306554  | -2.97833047 | -0.02233198 |

|   |             |             |             |   |             |             |             |
|---|-------------|-------------|-------------|---|-------------|-------------|-------------|
| 6 | 1.16971212  | -3.49742365 | 0.55800259  | 9 | 0.60270951  | 5.25852656  | 3.47260327  |
| 6 | -0.01062006 | -3.54772315 | -0.18372174 | 6 | 1.62511563  | -4.65622946 | 2.87134222  |
| 6 | -1.29863748 | -3.79857646 | 0.60167897  | 9 | 1.95803675  | -4.36557791 | 4.15437018  |
| 6 | -2.47334029 | -3.03874006 | -0.01532871 | 9 | 0.59688009  | -5.53396882 | 2.90796973  |
| 6 | -2.48095771 | -2.570631   | -1.3059585  | 9 | 2.68617247  | -5.27823131 | 2.29495062  |
| 6 | -3.20318697 | -1.37481376 | -1.61800141 | 6 | -1.66732677 | 5.28432778  | 0.9773688   |
| 6 | -3.9741483  | -0.70914369 | -0.65954373 | 9 | -2.64275414 | 5.46413383  | 1.90449379  |
| 6 | -3.97723728 | 0.74427163  | -0.61405374 | 9 | -0.60265817 | 6.03527151  | 1.3327457   |
| 6 | -3.21047278 | 1.47251956  | -1.53049217 | 9 | -2.12202558 | 5.77867741  | -0.20306703 |
| 6 | -2.49105142 | 2.64761734  | -1.14529568 | 6 | -1.65818628 | -5.33386005 | 0.73417268  |
| 6 | -1.32859325 | 2.8964201   | -2.10797945 | 9 | -0.57905427 | -6.12972325 | 0.55658256  |
| 6 | -0.02909978 | 3.15068581  | -1.33906045 | 9 | -2.1896178  | -5.60287125 | 1.95449758  |
| 6 | 1.143078    | 2.66070662  | -1.91625376 | 9 | -2.58286694 | -5.70139416 | -0.18868211 |
| 6 | 2.33198653  | 2.57462806  | -1.15606947 | 6 | -1.71065332 | 4.06079716  | -3.11753112 |
| 6 | 3.12580022  | 1.44712259  | -1.58712772 | 9 | -2.75802582 | 4.78905191  | -2.65284756 |
| 6 | 3.90575028  | 0.74434376  | -0.66306346 | 9 | -0.68490067 | 4.91968056  | -3.31800757 |
| 6 | 3.91020606  | -0.69073442 | -0.71368853 | 9 | -2.09064971 | 3.55943492  | -4.32058271 |
| 6 | 3.13442157  | -1.33486568 | -1.68656993 | 6 | -1.66274589 | -3.84127309 | -3.33261944 |
| 6 | 2.34359894  | -2.49358315 | -1.33600609 | 9 | -1.88922678 | -5.0325029  | -2.72658759 |
| 6 | 1.15032827  | -2.52321581 | -2.09339591 | 9 | -2.78385451 | -3.50529702 | -4.02255275 |
| 6 | -0.01651874 | -3.04820245 | -1.53941136 | 9 | -0.665737   | -4.02741503 | -4.22694818 |
| 6 | -1.31453948 | -2.7446653  | -2.28112429 | 6 | 1.56548694  | 2.29038839  | -4.45580265 |
| 6 | -1.23161577 | -1.31701217 | -2.89035885 | 9 | 0.58112764  | 3.1071846   | -4.89300868 |
| 6 | -2.41682538 | -0.61903872 | -2.56525726 | 9 | 2.70537744  | 3.02408558  | -4.36938245 |
| 6 | -2.42014433 | 0.78092685  | -2.52168018 | 9 | 1.75384453  | 1.33830409  | -5.40342005 |
| 6 | -1.23605369 | 1.5025369   | -2.79576997 | 6 | 1.59995845  | -2.00609344 | -4.62964605 |
| 6 | -0.06549179 | 0.82534087  | -3.13198211 | 9 | 2.04888168  | -3.28401552 | -4.53913384 |
| 6 | 1.22605577  | 1.63658719  | -3.08265532 | 9 | 0.54640022  | -1.98307254 | -5.47731907 |
| 6 | 2.40142293  | 0.77495851  | -2.62184517 | 9 | 2.59269062  | -1.28210891 | -5.20838551 |
| 6 | 2.40379635  | -0.59703848 | -2.66971641 | 8 | 1.71080132  | -1.22262538 | 5.30041161  |
| 6 | 1.23460903  | -1.42891332 | -3.19858819 | 8 | 1.25511634  | 0.84335474  | 5.43283022  |
| 6 | -0.06075497 | -0.6178352  | -3.18462215 |   |             |             |             |
| 6 | 1.64343838  | 4.43874697  | 3.21252897  |   |             |             |             |
| 9 | 2.11658092  | 4.00829598  | 4.41249682  |   |             |             |             |
| 9 | 2.6212033   | 5.1687035   | 2.61723129  |   |             |             |             |

**Compound 4**,  $C_5-C_{70}(CF_3)_8(O)_2$

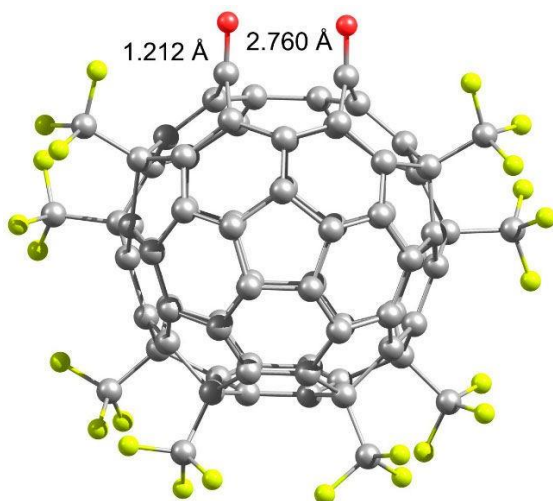

| N | X           | Y           | Z           |
|---|-------------|-------------|-------------|
| 6 | -0.81486747 | 3.14750128  | 2.22775765  |
| 6 | 0.55021413  | 3.02406153  | 2.55514694  |
| 6 | 1.04131668  | 2.42743174  | 3.85465532  |
| 6 | -1.09956605 | 0.75246673  | 4.48317076  |
| 6 | -1.99424645 | 1.03222299  | 3.29689475  |
| 6 | -1.97557555 | 2.23809333  | 2.56685489  |
| 6 | -2.90009943 | 2.35099027  | 1.47598866  |
| 6 | -2.41580748 | 3.29215216  | 0.50330207  |
| 6 | -1.12728999 | 3.73885235  | 0.95890891  |
| 6 | -0.12190952 | 4.01074105  | 0.0152601   |
| 6 | 1.23309586  | 3.71636133  | 0.30094504  |
| 6 | 1.56033995  | 3.22004489  | 1.55603965  |
| 6 | 2.90948459  | 2.52850555  | 1.72658814  |
| 6 | 2.78386931  | 1.29717658  | 2.64933261  |
| 6 | 1.78888937  | 1.14357716  | 3.60000722  |
| 6 | 1.2791578   | -0.18304195 | 3.90563937  |
| 6 | -0.13899514 | -0.36686736 | 4.16868009  |
| 6 | -0.78637851 | -1.49666563 | 3.69705107  |
| 6 | -2.25511275 | -1.50752127 | 3.22332568  |
| 6 | -2.69844651 | -0.11189742 | 2.79372527  |
| 6 | -3.52375252 | -0.00582992 | 1.68491531  |
| 6 | -3.6556965  | 1.24803256  | 1.0448631   |
| 6 | -3.91613369 | 1.05105838  | -0.36301867 |
| 6 | -3.44894126 | 1.98014131  | -1.30133097 |
| 6 | -2.68843717 | 3.13218358  | -0.85423113 |
| 6 | -1.64425427 | 3.38969686  | -1.8273706  |
| 6 | -0.38036193 | 3.80924026  | -1.39238885 |
| 6 | 0.81922982  | 3.3038487   | -1.98970105 |
| 6 | 1.99340646  | 3.43974285  | -1.02018817 |
| 6 | 2.7559673   | 2.1224876   | -0.88251118 |
| 6 | 3.27671077  | 1.82500713  | 0.38106569  |

|   |             |             |             |
|---|-------------|-------------|-------------|
| 6 | 3.70323405  | 0.50671815  | 0.66798172  |
| 6 | 3.4170093   | 0.18511403  | 2.04534626  |
| 6 | 3.07527034  | -1.10730358 | 2.42629119  |
| 6 | 1.9843009   | -1.29154972 | 3.34683033  |
| 6 | 1.30347639  | -2.49353838 | 2.94270476  |
| 6 | -0.08005456 | -2.54953538 | 3.06487993  |
| 6 | -0.89799069 | -3.08704088 | 2.00484699  |
| 6 | -2.13228602 | -2.39889652 | 1.95222589  |
| 6 | -2.75338535 | -2.17524406 | 0.72079612  |
| 6 | -3.8807225  | -1.13949859 | 0.69285221  |
| 6 | -3.8756158  | -0.35823615 | -0.62127502 |
| 6 | -3.28324975 | -0.81516505 | -1.77236135 |
| 6 | -2.73399867 | 0.12090788  | -2.70554652 |
| 6 | -2.84797742 | 1.5025328   | -2.51575308 |
| 6 | -1.73085479 | 2.37476093  | -2.84071792 |
| 6 | -0.54495497 | 1.83142576  | -3.34612009 |
| 6 | 0.73727606  | 2.32167189  | -2.94409483 |
| 6 | 1.8027286   | 1.24161051  | -3.14405498 |
| 6 | 2.66372699  | 1.0863091   | -1.88704192 |
| 6 | 3.09184113  | -0.20619079 | -1.5816426  |
| 6 | 3.61699165  | -0.49814104 | -0.30245013 |
| 6 | 3.28631841  | -1.85146041 | 0.08372472  |
| 6 | 3.03690381  | -2.15972017 | 1.4269226   |
| 6 | 1.93781319  | -3.01912488 | 1.74673989  |
| 6 | 1.14935159  | -3.52628427 | 0.70605328  |
| 6 | -0.29011123 | -3.55340378 | 0.83402703  |
| 6 | -0.90251105 | -3.32700443 | -0.41919403 |
| 6 | -2.11876788 | -2.64902002 | -0.48837724 |
| 6 | -2.5365707  | -2.14824974 | -1.86896055 |
| 6 | -1.27034135 | -1.71317874 | -2.65975784 |
| 6 | -1.50536954 | -0.43640143 | -3.22052604 |
| 6 | -0.43008977 | 0.40427036  | -3.53511833 |
| 6 | 0.89655769  | -0.01702588 | -3.28823612 |
| 6 | 1.14068636  | -1.27698692 | -2.74618837 |
| 6 | 2.54552902  | -1.5217914  | -2.20268795 |
| 6 | 2.50912028  | -2.42648789 | -0.97014901 |
| 6 | 1.45450109  | -3.25111414 | -0.6634455  |
| 6 | 0.19506866  | -3.3723025  | -1.52348458 |
| 6 | 0.03378865  | -2.14875544 | -2.42561085 |
| 6 | 4.00252074  | 3.47980875  | 2.31638185  |
| 9 | 3.7927995   | 3.64673071  | 3.65112149  |
| 9 | 5.24244503  | 2.95138109  | 2.15548637  |
| 9 | 3.99106905  | 4.70944977  | 1.76159686  |
| 6 | -3.16460528 | -2.10419169 | 4.33605167  |
| 9 | -3.03346803 | -1.38427724 | 5.48116964  |
| 9 | -4.47210342 | -2.08858715 | 3.99208644  |
| 9 | -2.81955152 | -3.38828222 | 4.61069195  |

|   |             |             |             |   |             |             |             |
|---|-------------|-------------|-------------|---|-------------|-------------|-------------|
| 6 | 2.92009062  | 4.60520385  | -1.49414297 | 9 | -3.71520648 | -2.74299334 | -3.87587087 |
| 9 | 2.28998631  | 5.80097399  | -1.36671496 | 9 | -2.78741568 | -4.38366194 | -2.75915627 |
| 9 | 4.08021607  | 4.66432401  | -0.80530151 | 6 | 3.4960367   | -2.13454208 | -3.27443023 |
| 9 | 3.2452236   | 4.44479063  | -2.80280883 | 9 | 3.62124096  | -1.3414505  | -4.36187462 |
| 6 | -5.312612   | -1.76105219 | 0.95720328  | 9 | 4.73779252  | -2.32983708 | -2.75903417 |
| 9 | -5.2400064  | -2.98342644 | 1.53259726  | 9 | 3.02746662  | -3.33477501 | -3.6978738  |
| 9 | -6.04826538 | -0.95495237 | 1.76558267  | 6 | 0.22641334  | -4.74330489 | -2.31987886 |
| 9 | -6.0088668  | -1.9011835  | -0.19898255 | 9 | -0.513172   | -5.69040716 | -1.68806894 |
| 6 | 2.64082814  | 1.55089505  | -4.45706889 | 9 | -0.23647161 | -4.61390501 | -3.58377514 |
| 9 | 2.47205145  | 2.83771185  | -4.85544357 | 9 | 1.49221     | -5.22825806 | -2.4062603  |
| 9 | 3.96754861  | 1.36025073  | -4.27192348 | 8 | -1.2182009  | 1.31224618  | 5.5519678   |
| 9 | 2.23689088  | 0.76942033  | -5.49098057 | 8 | 0.89870044  | 2.97028201  | 4.9295259   |
| 6 | -3.40988171 | -3.19008314 | -2.63019037 |   |             |             |             |
| 9 | -4.57415532 | -3.41076181 | -1.97048799 |   |             |             |             |

Transition state TS1b, C<sub>70</sub>(CF<sub>3</sub>)<sub>8</sub>...O...Py

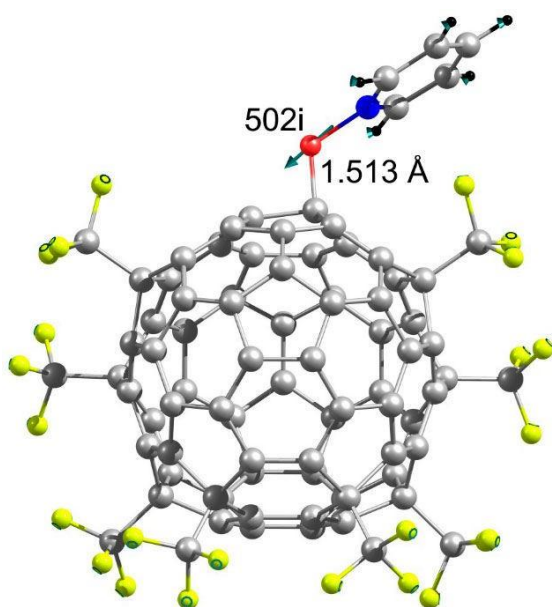

| N | X           | Y           | Z           |   |             |             |             |
|---|-------------|-------------|-------------|---|-------------|-------------|-------------|
| 9 | -4.18802477 | -2.60883093 | -3.8526735  | 9 | 0.05355402  | 5.48847576  | 3.02465319  |
| 9 | -3.94494505 | -0.7130527  | -4.93105315 | 9 | -0.49355339 | 4.01894545  | 4.54599599  |
| 9 | -2.49963564 | -2.32297978 | -5.21739372 | 9 | 0.0559116   | 6.45330028  | 0.50078197  |
| 9 | 1.60088855  | -3.7456442  | -4.78560659 | 9 | 1.57991947  | 6.37667114  | -1.05677806 |
| 9 | 0.20458502  | -2.4660928  | -5.85916393 | 9 | 2.1487839   | 6.03822758  | 1.02091081  |
| 9 | -0.54279675 | -4.07733548 | -4.56462025 | 9 | -1.73261255 | 4.81831105  | -4.12034731 |
| 9 | 1.48246494  | -5.58076604 | -0.44490322 | 9 | 0.30534237  | 4.58261667  | -4.88889058 |
| 9 | 2.14009968  | -5.01797207 | -2.4415341  | 9 | -0.07908797 | 5.84647358  | -3.13786451 |
| 9 | 3.51003178  | -4.79765513 | -0.74333034 | 9 | -4.83926322 | 1.74515535  | -4.03877052 |
| 9 | 0.03102129  | -4.33863307 | 3.65151553  | 9 | -4.24198685 | 3.73468722  | -3.37885922 |
| 9 | -0.83317744 | -5.39160476 | 1.93443573  | 9 | -3.17729006 | 2.74823649  | -5.02884077 |
| 9 | 1.3373594   | -5.1198597  | 2.09921601  | 6 | -3.5306505  | -1.3455194  | -0.94910322 |
| 9 | -2.05452321 | 4.97799179  | 3.33515086  | 6 | -3.90159173 | -0.84566632 | 0.30337773  |
|   |             |             |             | 6 | -4.05035782 | 0.57522395  | 0.46554829  |
|   |             |             |             | 6 | -3.82773969 | 1.40455989  | -0.64164925 |
|   |             |             |             | 6 | -3.52107854 | 0.8661126   | -1.93147279 |
|   |             |             |             | 6 | -3.38170895 | -0.48949339 | -2.08819214 |
|   |             |             |             | 6 | -2.44251246 | -1.13346007 | -3.10833374 |
|   |             |             |             | 6 | -1.77677545 | -2.23277709 | -2.23375214 |
|   |             |             |             | 6 | -2.53068312 | -2.38256199 | -1.04638122 |
|   |             |             |             | 6 | -1.92598284 | -2.88775392 | 0.11364388  |
|   |             |             |             | 6 | -2.29983235 | -2.36449859 | 1.40719199  |
|   |             |             |             | 6 | -3.27429387 | -1.36624768 | 1.50753148  |
|   |             |             |             | 6 | -3.04653206 | -0.26409962 | 2.40637849  |
|   |             |             |             | 6 | -3.52806817 | 0.93770042  | 1.76925169  |
|   |             |             |             | 6 | -2.7735346  | 2.11273504  | 1.90826006  |
|   |             |             |             | 6 | -2.54982762 | 2.97749089  | 0.76841541  |
|   |             |             |             | 6 | -3.06106648 | 2.61937329  | -0.48624105 |
|   |             |             |             | 6 | -2.31613816 | 2.88816276  | -1.65789806 |
|   |             |             |             | 6 | -2.76897408 | 1.89841095  | -2.77261398 |
|   |             |             |             | 6 | -1.52683588 | 1.27848876  | -3.41268042 |

|   |             |             |             |   |             |             |             |
|---|-------------|-------------|-------------|---|-------------|-------------|-------------|
| 6 | -1.37331436 | -0.14838692 | -3.57223651 | 6 | 3.06832309  | 1.69154522  | -2.7588363  |
| 6 | -0.11560176 | -0.68175968 | -3.8499721  | 6 | 3.21805347  | 0.25473466  | -2.92238618 |
| 6 | 0.38681643  | -2.10348488 | -3.46034335 | 6 | 3.84688206  | -0.26515644 | -1.7387136  |
| 6 | -0.43107004 | -2.5996628  | -2.26640859 | 6 | 3.41226072  | -1.50016161 | -1.23261871 |
| 6 | 0.19152362  | -3.11460577 | -1.06962921 | 6 | 3.21790427  | -1.67195063 | 0.18832603  |
| 6 | -0.55785022 | -3.24778133 | 0.10000602  | 6 | 3.47442488  | -0.60634254 | 1.05954191  |
| 6 | -0.00611391 | -3.15193762 | 1.55294415  | 6 | 2.58867337  | -0.38188332 | 2.16301973  |
| 6 | -1.12774135 | -2.35223564 | 2.22867468  | 6 | 2.45732272  | 1.05724449  | 2.34085148  |
| 6 | -0.90379753 | -1.30323935 | 3.08880029  | 6 | 3.24042476  | 1.68787553  | 1.32978403  |
| 6 | -1.85868844 | -0.23020447 | 3.15726844  | 6 | 2.75640513  | 2.84504454  | 0.70109961  |
| 6 | -1.12491444 | 1.00597472  | 3.2928281   | 6 | 2.93905651  | 3.0283774   | -0.71298409 |
| 6 | -1.61645144 | 2.17288869  | 2.73327928  | 6 | 3.61107433  | 2.05550832  | -1.47735495 |
| 6 | -0.68993184 | 3.30247511  | 2.26880354  | 6 | 4.08482883  | 0.84673681  | -0.83526465 |
| 6 | -1.28447728 | 3.60694753  | 0.86746673  | 6 | 3.90239845  | 0.67069102  | 0.53933979  |
| 6 | -0.5446393  | 3.89126172  | -0.28058949 | 6 | -3.27260829 | -1.7051871  | -4.29460036 |
| 6 | -1.07675371 | 3.52049778  | -1.57162741 | 6 | 0.40201081  | -3.11410844 | -4.68219356 |
| 6 | -0.20044393 | 3.46865995  | -2.81991444 | 6 | 2.21321775  | -4.66903734 | -1.13139527 |
| 6 | -0.40974501 | 2.10477635  | -3.53587702 | 6 | 0.14101918  | -4.52093871 | 2.29374083  |
| 6 | 0.85802262  | 1.55371821  | -3.83394857 | 6 | -0.79415491 | 4.46932115  | 3.29584656  |
| 6 | 1.00265904  | 0.1694858   | -3.99376576 | 6 | 1.17379027  | 5.79994457  | 0.10407436  |
| 6 | 2.20091865  | -0.48984796 | -3.52764532 | 6 | -0.43577304 | 4.69201407  | -3.7541058  |
| 6 | 1.82242286  | -1.78072619 | -3.040642   | 6 | -3.7610662  | 2.54525141  | -3.82490117 |
| 6 | 2.41846397  | -2.2776057  | -1.90884019 | 6 | 1.83197766  | -4.5675262  | 6.7549734   |
| 6 | 1.70869763  | -3.20716872 | -0.92130339 | 6 | 2.805728    | -3.90124867 | 6.00720657  |
| 6 | 2.13644004  | -2.56447803 | 0.42893256  | 6 | 2.49301036  | -2.6716592  | 5.43203435  |
| 6 | 1.30556632  | -2.37408476 | 1.53601911  | 7 | 1.26342221  | -2.16833813 | 5.59131416  |
| 6 | 1.53295876  | -1.27581974 | 2.43673513  | 6 | 0.29950622  | -2.77575291 | 6.29117898  |
| 6 | 0.48495991  | -0.76508441 | 3.38608714  | 6 | 0.56560698  | -3.99509307 | 6.90652755  |
| 6 | 0.28486955  | 0.72647478  | 3.36020335  | 1 | 2.05845175  | -5.52748472 | 7.21797086  |
| 6 | 1.21936137  | 1.61066721  | 2.75632921  | 1 | 3.80354902  | -4.31597939 | 5.87329464  |
| 6 | 0.75717994  | 2.83827812  | 2.11716746  | 1 | 3.19523866  | -2.06576968 | 4.86070835  |
| 6 | 1.50331097  | 3.40745572  | 1.10043986  | 1 | -0.65863779 | -2.25929782 | 6.34037209  |
| 6 | 0.93122638  | 4.24886438  | -0.07689449 | 1 | -0.21390078 | -4.48301372 | 7.4894827   |
| 6 | 1.78833757  | 3.71603399  | -1.22597598 | 8 | 0.88228517  | -0.74646094 | 4.84562323  |
| 6 | 1.28242113  | 3.37230064  | -2.45305354 |   |             |             |             |
| 6 | 1.90579143  | 2.32460842  | -3.20758558 |   |             |             |             |



**Compound 3b, C<sub>5</sub>-C<sub>70</sub>(CF<sub>3</sub>)<sub>8</sub>O**

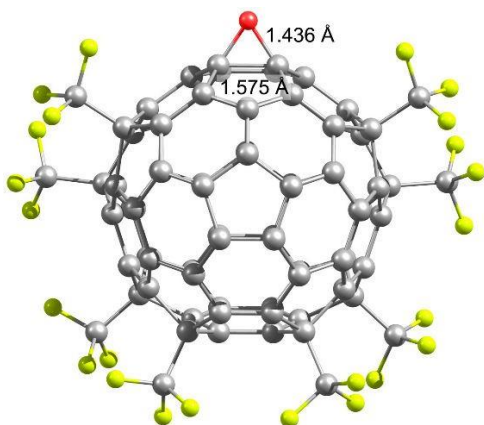

| N | X           | Y           | Z           |
|---|-------------|-------------|-------------|
| 9 | -4.12641863 | -2.89223681 | -3.13076733 |
| 9 | -3.94319984 | -0.94924442 | -4.13458737 |
| 9 | -2.50148641 | -2.53350552 | -4.55394132 |
| 9 | 1.63581149  | -3.90581028 | -4.38031573 |
| 9 | 0.1687989   | -2.60272778 | -5.3235448  |
| 9 | -0.4894371  | -4.28650978 | -4.07345178 |
| 9 | 1.72073749  | -5.95380468 | -0.16985246 |
| 9 | 2.34623554  | -5.25824579 | -2.13351039 |
| 9 | 3.73369637  | -5.12279545 | -0.44039046 |
| 9 | 0.60941415  | -4.80548411 | 4.11373525  |
| 9 | -0.55149265 | -5.82691775 | 2.55321595  |
| 9 | 1.62862822  | -5.64954231 | 2.38596806  |
| 9 | -1.75712918 | 4.36415496  | 4.2955722   |
| 9 | 0.32342329  | 4.93016753  | 3.9044742   |
| 9 | -0.12025437 | 3.38321306  | 5.38258433  |
| 9 | 0.19687319  | 6.01215761  | 1.43069474  |
| 9 | 1.65043139  | 6.03505287  | -0.19475684 |
| 9 | 2.31762461  | 5.61083507  | 1.8377669   |
| 9 | -1.7724096  | 4.56254066  | -3.17311534 |
| 9 | 0.23065703  | 4.39222666  | -4.04431542 |
| 9 | -0.08817759 | 5.56953997  | -2.22105913 |
| 9 | -4.833868   | 1.44767844  | -3.09018026 |
| 9 | -4.22728192 | 3.41355813  | -2.37012995 |
| 9 | -3.23079185 | 2.51475237  | -4.11073812 |
| 6 | -3.34771481 | -1.76316258 | -0.20814856 |
| 6 | -3.66884929 | -1.32434005 | 1.08100466  |
| 6 | -3.82746984 | 0.0841788   | 1.31092714  |
| 6 | -3.65838579 | 0.96534661  | 0.23702474  |
| 6 | -3.40899243 | 0.491772    | -1.09087334 |
| 6 | -3.25736147 | -0.85320673 | -1.310376   |
| 6 | -2.35945215 | -1.43748228 | -2.40075823 |
| 6 | -1.64357084 | -2.56749092 | -1.60975135 |
| 6 | -2.34235981 | -2.7827544  | -0.39935403 |

| N | X           | Y           | Z           |
|---|-------------|-------------|-------------|
| 6 | -1.6824978  | -3.33504173 | 0.70740284  |
| 6 | -2.00502764 | -2.86883501 | 2.03634584  |
| 6 | -2.98390742 | -1.88994315 | 2.23208724  |
| 6 | -2.72681577 | -0.82740745 | 3.17209596  |
| 6 | -3.24118593 | 0.39422311  | 2.60497946  |
| 6 | -2.50477897 | 1.57225404  | 2.76163337  |
| 6 | -2.3369129  | 2.48729973  | 1.65642737  |
| 6 | -2.90375733 | 2.18454896  | 0.41104504  |
| 6 | -2.2168957  | 2.515439    | -0.77985659 |
| 6 | -2.7090965  | 1.5713262   | -1.91700334 |
| 6 | -1.48961989 | 0.99860159  | -2.63905382 |
| 6 | -1.32465158 | -0.41766221 | -2.86722857 |
| 6 | -0.07509463 | -0.92107182 | -3.22385379 |
| 6 | 0.4610921   | -2.35138961 | -2.92221049 |
| 6 | -0.29640169 | -2.91410578 | -1.71760137 |
| 6 | 0.38462691  | -3.47737768 | -0.57486346 |
| 6 | -0.31083461 | -3.67827458 | 0.61991751  |
| 6 | 0.30385506  | -3.62948778 | 2.04967309  |
| 6 | -0.79862651 | -2.87292307 | 2.79972953  |
| 6 | -0.54954875 | -1.86484965 | 3.6978713   |
| 6 | -1.50759597 | -0.80475203 | 3.87729275  |
| 6 | -0.80848994 | 0.43930542  | 4.07598496  |
| 6 | -1.3023464  | 1.60017746  | 3.5332764   |
| 6 | -0.41761533 | 2.77016024  | 3.08895386  |
| 6 | -1.0762707  | 3.12832708  | 1.72891882  |
| 6 | -0.39503603 | 3.47670289  | 0.56146223  |
| 6 | -0.98205971 | 3.15986191  | -0.7202     |
| 6 | -0.16442726 | 3.17917553  | -2.00888014 |
| 6 | -0.38934698 | 1.84533928  | -2.77460995 |
| 6 | 0.86939151  | 1.32553421  | -3.15340617 |
| 6 | 1.0250571   | -0.04783785 | -3.37915136 |
| 6 | 2.25059596  | -0.71034425 | -2.99656902 |
| 6 | 1.90959602  | -2.02686085 | -2.55217318 |
| 6 | 2.56145262  | -2.5657298  | -1.47223343 |
| 6 | 1.90946606  | -3.55180893 | -0.50137839 |
| 6 | 2.38766789  | -2.96062233 | 0.85424103  |
| 6 | 1.60791978  | -2.8407876  | 2.00140105  |
| 6 | 1.87188561  | -1.78165242 | 2.94138442  |
| 6 | 0.83208626  | -1.34676533 | 3.88719536  |
| 6 | 0.65864292  | 0.19767406  | 4.1404363   |
| 6 | 1.54535876  | 1.12053173  | 3.41614802  |
| 6 | 1.02386517  | 2.33600708  | 2.84510787  |
| 6 | 1.71651789  | 2.9703714   | 1.82041592  |
| 6 | 1.08164093  | 3.85435147  | 0.71198777  |
| 6 | 1.89344395  | 3.38879916  | -0.4979234  |
| 6 | 1.33500198  | 3.08930873  | -1.71535746 |

| N | X          | Y           | Z           |
|---|------------|-------------|-------------|
| 6 | 1.93471003 | 2.08245748  | -2.53771613 |
| 6 | 3.1249432  | 1.44593686  | -2.17183053 |
| 6 | 3.28544408 | 0.01999532  | -2.40440622 |
| 6 | 3.97219724 | -0.54382222 | -1.27424534 |
| 6 | 3.57505932 | -1.80535822 | -0.80502293 |
| 6 | 3.45055984 | -2.04529703 | 0.61327913  |
| 6 | 3.73318573 | -1.01863755 | 1.52531518  |
| 6 | 2.90090665 | -0.86244532 | 2.67716829  |
| 6 | 2.73894116 | 0.57667781  | 2.91284645  |
| 6 | 3.47606136 | 1.26237191  | 1.8978629   |
| 6 | 2.94523926 | 2.43558636  | 1.3447434   |
| 6 | 3.07084913 | 2.69273306  | -0.07036686 |
| 6 | 3.71285205 | 1.75907963  | -0.89791067 |
| 6 | 4.23195422 | 0.52761872  | -0.33032701 |

| N | X           | Y           | Z           |
|---|-------------|-------------|-------------|
| 6 | 4.11500528  | 0.28935805  | 1.04007596  |
| 6 | -3.23865574 | -1.96410338 | -3.57411766 |
| 6 | 0.43357481  | -3.30392545 | -4.19146395 |
| 6 | 2.43166586  | -4.99518827 | -0.80381628 |
| 6 | 0.50662999  | -5.00498033 | 2.76930819  |
| 6 | -0.49204386 | 3.88663457  | 4.17382453  |
| 6 | 1.30664244  | 5.40128317  | 0.95468285  |
| 6 | -0.45893233 | 4.44093805  | -2.87464727 |
| 6 | -3.75698852 | 2.25202468  | -2.89288311 |
| 8 | 1.1636482   | -0.71064041 | 5.13073577  |

Transition state TS2b,  $C_{70}(CF_3)_8(O)...O...Py$

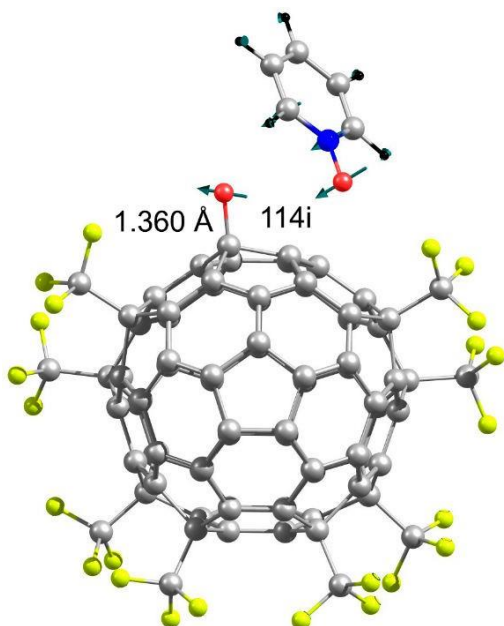

| N | X           | Y           | Z           |
|---|-------------|-------------|-------------|
| 9 | -2.14734165 | 4.46913807  | 3.70708556  |
| 9 | -0.02734844 | 4.96938973  | 3.45862353  |
| 9 | -0.61360182 | 3.38367589  | 4.84190934  |
| 9 | -0.01823518 | 6.18438582  | 1.0420383   |
| 9 | 1.51523296  | 6.24104622  | -0.50733429 |
| 9 | 2.06705734  | 5.69843004  | 1.53108634  |
| 9 | -1.81372668 | 5.03833525  | -3.71088008 |
| 9 | 0.22597396  | 4.85937778  | -4.48983794 |
| 9 | -0.15534504 | 5.94487311  | -2.62218036 |
| 9 | -4.97637189 | 2.03629165  | -3.91205812 |
| 9 | -4.32828349 | 3.94022032  | -3.07314024 |
| 9 | -3.29639862 | 3.08960256  | -4.81706659 |
| 6 | -3.70982109 | -1.37874704 | -1.1737689  |
| 6 | -4.07102436 | -1.00148184 | 0.12759191  |
| 6 | -4.19915931 | 0.39819108  | 0.43279184  |
| 6 | -3.95912609 | 1.33053033  | -0.58355293 |
| 6 | -3.66431082 | 0.92218962  | -1.92110958 |
| 6 | -3.54652582 | -0.41498222 | -2.2152483  |
| 6 | -2.61774663 | -0.96431171 | -3.29901488 |
| 6 | -1.97312381 | -2.16173125 | -2.54656344 |
| 6 | -2.73091238 | -2.42098077 | -1.38059044 |
| 6 | -2.13856289 | -3.05564091 | -0.28167401 |
| 6 | -2.49948058 | -2.65705053 | 1.06207492  |
| 6 | -3.45093913 | -1.64805402 | 1.2654833   |
| 6 | -3.20953106 | -0.64585971 | 2.27600991  |
| 6 | -3.66812841 | 0.61980601  | 1.76575737  |
| 6 | -2.89988206 | 1.76131839  | 2.02570475  |
| 6 | -2.65611444 | 2.72625226  | 0.97756879  |
| 6 | -3.17497753 | 2.5123808   | -0.30618791 |

| N | X           | Y           | Z           |
|---|-------------|-------------|-------------|
| 9 | -4.3751173  | -2.33130855 | -4.20332884 |
| 9 | -4.12240936 | -0.32434308 | -5.05405973 |
| 9 | -2.68793269 | -1.89812627 | -5.53120402 |
| 9 | 1.37370854  | -3.48761807 | -5.21076382 |
| 9 | 0.0514452   | -2.04881188 | -6.17427299 |
| 9 | -0.78546197 | -3.75287815 | -5.0673258  |
| 9 | 1.32336335  | -5.7107514  | -0.96458212 |
| 9 | 1.77529534  | -5.04309231 | -2.99068178 |
| 9 | 3.30731735  | -4.90051598 | -1.42667755 |
| 9 | -0.53149943 | -5.01556057 | 3.00146949  |
| 9 | -0.92684085 | -5.83083656 | 1.01353331  |
| 9 | 1.135959    | -5.46381762 | 1.67521462  |

| N | X           | Y           | Z           | N | X           | Y           | Z            |
|---|-------------|-------------|-------------|---|-------------|-------------|--------------|
| 6 | -2.42654937 | 2.88607784  | -1.44579875 | 6 | 1.78347321  | 2.41514276  | -3.04542035  |
| 6 | -2.8953683  | 2.02212995  | -2.65428016 | 6 | 2.93442442  | 1.71979516  | -2.66145197  |
| 6 | -1.66296642 | 1.45110161  | -3.35597353 | 6 | 3.06054144  | 0.30326647  | -2.96698738  |
| 6 | -1.53179079 | 0.04510787  | -3.65917601 | 6 | 3.67477025  | -0.34509688 | -1.84362309  |
| 6 | -0.28418298 | -0.47910827 | -3.99113466 | 6 | 3.22019788  | -1.61965767 | -1.467313101 |
| 6 | 0.19396694  | -1.94187811 | -3.75021508 | 6 | 3.02162922  | -1.93453798 | -0.07412649  |
| 6 | -0.63401599 | -2.5461979  | -2.61560288 | 6 | 3.29284203  | -0.96617254 | 0.90733891   |
| 6 | -0.02329323 | -3.19523969 | -1.47866989 | 6 | 2.39793411  | -0.8389245  | 2.0075831    |
| 6 | -0.77724605 | -3.43667899 | -0.33105102 | 6 | 2.26701153  | 0.59331883  | 2.32072342   |
| 6 | -0.22965638 | -3.51047514 | 1.12485436  | 6 | 3.08341183  | 1.30264744  | 1.39639785   |
| 6 | -1.33504195 | -2.75712601 | 1.87325349  | 6 | 2.62596998  | 2.53070457  | 0.89291862   |
| 6 | -1.0773467  | -1.7736508  | 2.81942998  | 6 | 2.8237659   | 2.8542323   | -0.49892786  |
| 6 | -2.01835858 | -0.69337461 | 3.01876897  | 6 | 3.47405641  | 1.94491303  | -1.3487977   |
| 6 | -1.29304739 | 0.50253839  | 3.33526909  | 6 | 3.92665284  | 0.66624153  | -0.8296709   |
| 6 | -1.73457638 | 1.70958045  | 2.85369209  | 6 | 3.73431313  | 0.35601924  | 0.5151057    |
| 6 | -0.79972714 | 2.87602885  | 2.5101213   | 6 | -3.45595842 | -1.38922079 | -4.54099691  |
| 6 | -1.38173977 | 3.32136295  | 1.14094004  | 6 | 0.19739291  | -2.82298979 | -5.0681706   |
| 6 | -0.63958742 | 3.71254456  | 0.02505418  | 6 | 1.97815748  | -4.76566007 | -1.67784443  |
| 6 | -1.17713026 | 3.48572132  | -1.29690069 | 6 | -0.12904213 | -4.97777872 | 1.70836403   |
| 6 | -0.30297796 | 3.54917991  | -2.54661807 | 6 | -0.89394174 | 3.94403689  | 3.63951231   |
| 6 | -0.53294082 | 2.26734362  | -3.39534768 | 6 | 1.09544787  | 5.56178221  | 0.59145274   |
| 6 | 0.72565458  | 1.72804505  | -3.74798698 | 6 | -0.52068395 | 4.8635506   | -3.35381112  |
| 6 | 0.84867286  | 0.36455401  | -4.04674684 | 6 | -3.87906464 | 2.7884242   | -3.63389035  |
| 6 | 2.03250654  | -0.35920092 | -3.64777652 | 8 | 0.52847941  | 0.08972676  | 4.91979482   |
| 6 | 1.63337396  | -1.68776666 | -3.29859056 | 6 | 3.94535059  | -1.93911615 | 6.99615045   |
| 6 | 2.21829698  | -2.30949458 | -2.22400933 | 6 | 4.12538963  | -2.7570919  | 5.87462528   |
| 6 | 1.49305734  | -3.3243296  | -1.33913163 | 6 | 3.04408898  | -3.07244063 | 5.07219773   |
| 6 | 1.92682922  | -2.83461576 | 0.07045746  | 7 | 1.78984032  | -2.59906873 | 5.37027786   |
| 6 | 1.10095691  | -2.76865562 | 1.1882309   | 6 | 1.59583443  | -1.79260857 | 6.46069227   |
| 6 | 1.32720762  | -1.73925326 | 2.18444729  | 6 | 2.66467831  | -1.46201305 | 7.27950576   |
| 6 | 0.25637894  | -1.28154004 | 3.0304181   | 1 | 4.78825397  | -1.68396479 | 7.63655747   |
| 6 | 0.17431606  | 0.1737756   | 3.60905997  | 1 | 5.10332103  | -3.16104748 | 5.61792623   |
| 6 | 1.07042889  | 1.13128695  | 2.79834842  | 1 | 3.08284543  | -3.70974716 | 4.19279864   |
| 6 | 0.63610953  | 2.40400322  | 2.30890589  | 1 | 0.5745397   | -1.45409519 | 6.58981372   |
| 6 | 1.39783329  | 3.07747033  | 1.34891683  | 1 | 2.47762747  | -0.81992312 | 8.13836266   |
| 6 | 0.83861419  | 4.03667988  | 0.25984557  | 8 | 0.78242898  | -2.9040191  | 4.60037458   |
| 6 | 1.68915431  | 3.61120961  | -0.93916447 |   |             |             |              |
| 6 | 1.17813369  | 3.39528235  | -2.19411984 |   |             |             |              |

**Intermediate Int1b, C<sub>5</sub>-C<sub>70</sub>(CF<sub>3</sub>)<sub>8</sub>O<sub>2</sub>Py**

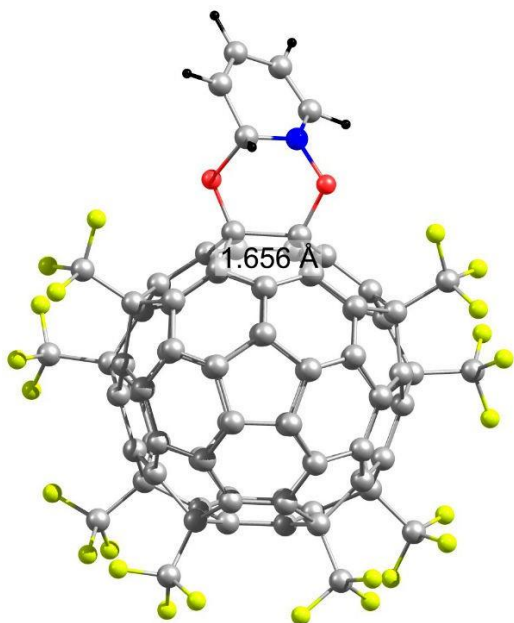

| N | X           | Y           | Z           |
|---|-------------|-------------|-------------|
| 6 | -3.61275402 | 0.85379694  | -1.84385613 |
| 6 | -3.50998704 | -0.4763915  | -2.17049183 |
| 6 | -2.61173899 | -1.0064313  | -3.28887726 |
| 6 | -1.95839011 | -2.22603487 | -2.58095832 |
| 6 | -2.69027846 | -2.50900749 | -1.40469107 |
| 6 | -2.07465433 | -3.17402957 | -0.33595396 |
| 6 | -2.39782535 | -2.79714474 | 1.02064643  |
| 6 | -3.34154394 | -1.79842074 | 1.27451171  |
| 6 | -3.05677986 | -0.8237722  | 2.2924876   |
| 6 | -3.51871324 | 0.45396871  | 1.82843997  |
| 6 | -2.7361309  | 1.58086852  | 2.09974479  |
| 6 | -2.51769997 | 2.57542858  | 1.07399547  |
| 6 | -3.07109576 | 2.39824789  | -0.20106867 |
| 6 | -2.34830111 | 2.7961665   | -1.34882674 |
| 6 | -2.8524668  | 1.96632018  | -2.56718512 |
| 6 | -1.64088155 | 1.40348014  | -3.31078254 |
| 6 | -1.52715424 | 0.00420072  | -3.65090728 |
| 6 | -0.29165996 | -0.51999867 | -4.02434956 |
| 6 | 0.18071378  | -1.99123775 | -3.83223117 |
| 6 | -0.62418333 | -2.61796319 | -2.69233971 |
| 6 | 0.00981632  | -3.2986047  | -1.58693538 |
| 6 | -0.71658161 | -3.56419342 | -0.42598084 |
| 6 | -0.13289871 | -3.66485157 | 1.01500592  |
| 6 | -1.2063162  | -2.90901806 | 1.7973597   |
| 6 | -0.92459795 | -1.96545742 | 2.7550839   |
| 6 | -1.84026353 | -0.89786022 | 3.00148954  |
| 6 | -1.10741058 | 0.27845239  | 3.34967584  |
| 6 | -1.55473606 | 1.50245491  | 2.89964531  |
| 6 | -0.62730646 | 2.6731386   | 2.56471646  |
| 6 | -1.23831336 | 3.15915744  | 1.22111727  |
| 6 | -0.52054265 | 3.57402252  | 0.09789307  |
| 6 | -1.09114324 | 3.38395265  | -1.21540716 |
| 6 | -0.24594398 | 3.47161358  | -2.48383155 |
| 6 | -0.5059107  | 2.21205427  | -3.35680621 |
| 6 | 0.73986132  | 1.67278727  | -3.75244186 |
| 6 | 0.84590147  | 0.31649631  | -4.08652417 |
| 6 | 2.03387461  | -0.42549096 | -3.73590039 |
| 6 | 1.632505    | -1.75902431 | -3.40880446 |
| 6 | 2.23864331  | -2.41140385 | -2.36470191 |
| 6 | 1.52671854  | -3.44353708 | -1.48744696 |
| 6 | 1.99875286  | -2.98764229 | -0.07575357 |
| 6 | 1.19918907  | -2.93008689 | 1.0709565   |
| 6 | 1.46825469  | -1.94953163 | 2.08921382  |
| 6 | 0.47138497  | -1.62176148 | 3.19238663  |
| 6 | 0.36237591  | -0.02369173 | 3.61325363  |
| 6 | 1.22788249  | 0.89818957  | 2.75235824  |

  

| N | X           | Y           | Z           |
|---|-------------|-------------|-------------|
| 9 | -4.41611879 | -2.32479764 | -4.17118838 |
| 9 | -4.13843655 | -0.31340302 | -5.00443827 |
| 9 | -2.74820946 | -1.91244972 | -5.5290254  |
| 9 | 1.32345764  | -3.47505306 | -5.38561147 |
| 9 | -0.05938112 | -2.03288789 | -6.25163577 |
| 9 | -0.82406956 | -3.78052638 | -5.15946395 |
| 9 | 1.2508464   | -5.85275925 | -1.32372909 |
| 9 | 1.89297879  | -5.04378083 | -3.23919191 |
| 9 | 3.29206635  | -5.07995149 | -1.55006259 |
| 9 | -0.05547754 | -5.07872842 | 2.95767786  |
| 9 | -1.059032   | -5.88624766 | 1.18234021  |
| 9 | 1.13052509  | -5.73633325 | 1.25678169  |
| 9 | -1.92336297 | 4.28291582  | 3.7923413   |
| 9 | 0.2135341   | 4.71859687  | 3.55815576  |
| 9 | -0.42936166 | 3.13038633  | 4.91142272  |
| 9 | 0.1524587   | 6.00357971  | 1.18957044  |
| 9 | 1.62230782  | 6.10139097  | -0.41829053 |
| 9 | 2.25315038  | 5.4918823   | 1.5784867   |
| 9 | -1.7734575  | 5.00343582  | -3.5678371  |
| 9 | 0.24079134  | 4.82086342  | -4.41085446 |
| 9 | -0.0736648  | 5.86679456  | -2.50832929 |
| 9 | -4.95597571 | 2.02309364  | -3.78353165 |
| 9 | -4.28619097 | 3.89965266  | -2.89972457 |
| 9 | -3.29060011 | 3.09932638  | -4.68851842 |
| 6 | -3.65920802 | -1.46644178 | -1.15021381 |
| 6 | -3.98744093 | -1.11861358 | 0.16563915  |
| 6 | -4.09580912 | 0.27266565  | 0.50710906  |
| 6 | -3.87094451 | 1.22935956  | -0.48944806 |

| N | X           | Y           | Z           | N | X           | Y           | Z           |
|---|-------------|-------------|-------------|---|-------------|-------------|-------------|
| 6 | 0.79136389  | 2.18660612  | 2.30869807  | 6 | 0.14421153  | -2.83498365 | -5.17470083 |
| 6 | 1.53758657  | 2.88221808  | 1.3537297   | 6 | 1.99356058  | -4.87805263 | -1.89463929 |
| 6 | 0.96480294  | 3.8786528   | 0.30686462  | 6 | -0.02082914 | -5.11544244 | 1.59926772  |
| 6 | 1.78464702  | 3.4787616   | -0.92265341 | 6 | -0.68662855 | 3.72075349  | 3.71771329  |
| 6 | 1.24224579  | 3.29840979  | -2.17044856 | 6 | 1.24376793  | 5.3903843   | 0.67469169  |
| 6 | 1.81902243  | 2.33423803  | -3.05833678 | 6 | -0.47245594 | 4.80669408  | -3.25375963 |
| 6 | 2.97358551  | 1.62044477  | -2.72002444 | 6 | -3.85134853 | 2.76377018  | -3.50397468 |
| 6 | 3.08256493  | 0.21155956  | -3.06435093 | 8 | 0.80946841  | 0.29667534  | 4.93670701  |
| 6 | 3.71936881  | -0.47041032 | -1.97231435 | 6 | 2.88326092  | -0.60896903 | 7.28474698  |
| 6 | 3.26491869  | -1.7501677  | -1.61782736 | 6 | 3.56432153  | -1.4955262  | 6.38249945  |
| 6 | 3.09573843  | -2.10112969 | -0.2270332  | 6 | 2.82553898  | -2.13686318 | 5.43129608  |
| 6 | 3.38832264  | -1.15856169 | 0.76974094  | 7 | 1.46639759  | -1.93905449 | 5.39173051  |
| 6 | 2.52891623  | -1.0630886  | 1.90258038  | 6 | 0.81527033  | -0.80400924 | 5.94625753  |
| 6 | 2.40844168  | 0.36629772  | 2.24204744  | 6 | 1.56528273  | -0.31060052 | 7.13354463  |
| 6 | 3.20668375  | 1.09580958  | 1.31825398  | 1 | 3.43416062  | -0.18948344 | 8.12772658  |
| 6 | 2.74755831  | 2.33831998  | 0.85712883  | 1 | 4.62269891  | -1.71629326 | 6.48962543  |
| 6 | 2.92177137  | 2.70123124  | -0.52899819 | 1 | 3.20753711  | -2.88161483 | 4.73662808  |
| 6 | 3.54350869  | 1.8076533   | -1.41473348 | 1 | -0.23677383 | -1.05898506 | 6.14768019  |
| 6 | 3.99879257  | 0.5120241   | -0.93907419 | 1 | 1.0386398   | 0.35381006  | 7.81502767  |
| 6 | 3.82942484  | 0.16843911  | 0.40084451  | 8 | 0.72191242  | -2.52550971 | 4.36030401  |
| 6 | -3.48430411 | -1.39818734 | -4.5178242  |   |             |             |             |

Transition state TS3b,  $C_{70}(CF_3)_8(O)_2 \dots Py$

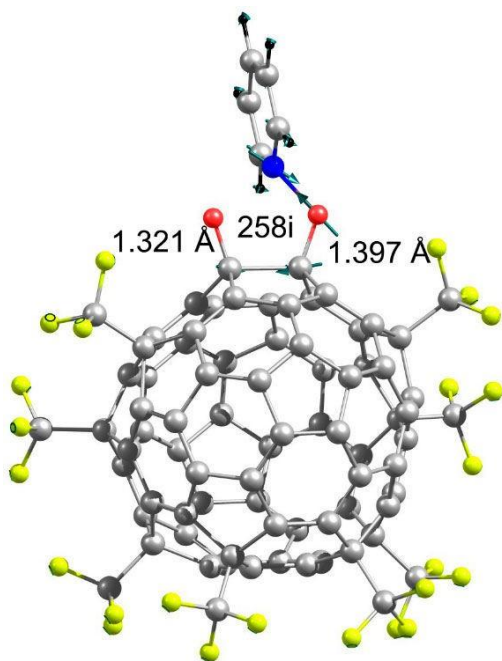

| N | X           | Y           | Z           | N | X           | Y           | Z           |
|---|-------------|-------------|-------------|---|-------------|-------------|-------------|
| 9 | -4.44614835 | -2.39706795 | -4.10604694 | 9 | -0.12087255 | -2.14790058 | -6.24388298 |
| 9 | -4.18827414 | -0.41013459 | -5.00122366 | 9 | -0.85860239 | -3.86785258 | -5.09139212 |
| 9 | -2.79608699 | -2.01703773 | -5.49416807 | 9 | 1.26545824  | -5.81987161 | -1.23482483 |
| 9 | 1.28316247  | -3.555131   | -5.35610441 | 9 | 1.89156493  | -5.05860078 | -3.17424171 |
|   |             |             |             | 9 | 3.30165649  | -5.04504685 | -1.49446862 |
|   |             |             |             | 9 | 0.04597932  | -4.91155802 | 3.05886867  |
|   |             |             |             | 9 | -1.03426764 | -5.77714634 | 1.35635637  |
|   |             |             |             | 9 | 1.15641495  | -5.64351836 | 1.33748155  |
|   |             |             |             | 9 | -1.91184664 | 4.4247159   | 3.66021045  |
|   |             |             |             | 9 | 0.20344043  | 4.91133133  | 3.35057138  |
|   |             |             |             | 9 | -0.35427593 | 3.34217342  | 4.76355957  |
|   |             |             |             | 9 | 0.1403255   | 6.1145524   | 0.93160621  |
|   |             |             |             | 9 | 1.62118249  | 6.15689635  | -0.66833567 |
|   |             |             |             | 9 | 2.23773287  | 5.61636895  | 1.35202862  |
|   |             |             |             | 9 | -1.82786669 | 4.96343223  | -3.74213253 |
|   |             |             |             | 9 | 0.17534541  | 4.76140735  | -4.6059692  |
|   |             |             |             | 9 | -0.11644475 | 5.85837013  | -2.72893935 |
|   |             |             |             | 9 | -4.99878264 | 1.96019741  | -3.84565096 |
|   |             |             |             | 9 | -4.33101155 | 3.86351865  | -3.02012683 |
|   |             |             |             | 9 | -3.34729754 | 3.01904383  | -4.79471567 |
|   |             |             |             | 6 | -3.65946715 | -1.44509915 | -1.11964717 |
|   |             |             |             | 6 | -3.97349673 | -1.06027486 | 0.18934462  |
|   |             |             |             | 6 | -4.08406158 | 0.33970935  | 0.49089522  |

|   |             |             |             |   |             |             |             |
|---|-------------|-------------|-------------|---|-------------|-------------|-------------|
| 6 | -3.87685043 | 1.2680059   | -0.53639905 | 6 | 0.40019601  | 0.21271365  | 3.62681658  |
| 6 | -3.63176873 | 0.85354348  | -1.88215046 | 6 | 1.26992763  | 1.0688499   | 2.6886721   |
| 6 | -3.52696665 | -0.48524096 | -2.17082562 | 6 | 0.8191929   | 2.33558177  | 2.19027493  |
| 6 | -2.63867498 | -1.04432797 | -3.28286221 | 6 | 1.5456629   | 2.99858153  | 1.19915208  |
| 6 | -1.97186668 | -2.24009143 | -2.54671115 | 6 | 0.95672549  | 3.95893498  | 0.12752875  |
| 6 | -2.68857004 | -2.49039732 | -1.3539836  | 6 | 1.76399124  | 3.52440168  | -1.09779247 |
| 6 | -2.05730439 | -3.11989167 | -0.27255656 | 6 | 1.20917865  | 3.30597272  | -2.3338443  |
| 6 | -2.36542535 | -2.70377053 | 1.07544991  | 6 | 1.78030909  | 2.3191196   | -3.20062339 |
| 6 | -3.31090239 | -1.70340038 | 1.31050779  | 6 | 2.94134284  | 1.62002958  | -2.85431854 |
| 6 | -3.01633063 | -0.69942047 | 2.29692724  | 6 | 3.05240832  | 0.20249383  | -3.15914904 |
| 6 | -3.49339627 | 0.56178918  | 1.79989826  | 6 | 3.70326689  | -0.44497772 | -2.05374292 |
| 6 | -2.71527048 | 1.70061742  | 2.02603068  | 6 | 3.25807405  | -1.71554157 | -1.65796008 |
| 6 | -2.51253635 | 2.66602977  | 0.97062203  | 6 | 3.10347924  | -2.02678431 | -0.25577735 |
| 6 | -3.07896614 | 2.44867666  | -0.29222373 | 6 | 3.39480999  | -1.05202081 | 0.71055195  |
| 6 | -2.36994365 | 2.81495397  | -1.45895072 | 6 | 2.55143099  | -0.93007561 | 1.8551961   |
| 6 | -2.88395343 | 1.94705774  | -2.64655727 | 6 | 2.43498492  | 0.51107701  | 2.16397517  |
| 6 | -1.67848124 | 1.36764941  | -3.3868685  | 6 | 3.21495997  | 1.21271702  | 1.19889624  |
| 6 | -1.56269183 | -0.04063557 | -3.68716956 | 6 | 2.75235873  | 2.44220024  | 0.70595868  |
| 6 | -0.32912377 | -0.57059983 | -4.05919562 | 6 | 2.90784021  | 2.76201532  | -0.69295625 |
| 6 | 0.15175297  | -2.03409392 | -3.82932616 | 6 | 3.52432683  | 1.84678311  | -1.56038306 |
| 6 | -0.63740733 | -2.63057274 | -2.66186311 | 6 | 3.9870915   | 0.567716    | -1.05183423 |
| 6 | 0.01134563  | -3.27763958 | -1.5447713  | 6 | 3.82960686  | 0.26314435  | 0.30006422  |
| 6 | -0.70051191 | -3.51223586 | -0.36647808 | 6 | -3.52283142 | -1.47642213 | -4.48964305 |
| 6 | -0.10149853 | -3.57045819 | 1.0722148   | 6 | 0.10263618  | -2.91654864 | -5.14667827 |
| 6 | -1.17105456 | -2.79601437 | 1.84999502  | 6 | 1.99974201  | -4.85651151 | -1.8351756  |
| 6 | -0.88414046 | -1.83765179 | 2.7965965   | 6 | 0.02482622  | -4.9985175  | 1.69980015  |
| 6 | -1.79398307 | -0.75115921 | 3.00333033  | 6 | -0.66329443 | 3.89231131  | 3.56299858  |
| 6 | -1.0698119  | 0.44383903  | 3.2977301   | 6 | 1.234072    | 5.4829368   | 0.44553561  |
| 6 | -1.52668986 | 1.6493087   | 2.81509409  | 6 | -0.52265076 | 4.77697137  | -3.43946627 |
| 6 | -0.605677   | 2.8153848   | 2.43973914  | 6 | -3.89541856 | 2.7132267   | -3.59596509 |
| 6 | -1.23269213 | 3.25800731  | 1.08791969  | 8 | 0.75074759  | 0.33587495  | 4.89437813  |
| 6 | -0.52942287 | 3.64209155  | -0.05511857 | 6 | 2.9196461   | -1.64857662 | 7.98005053  |
| 6 | -1.1137616  | 3.41088092  | -1.35612371 | 6 | 3.60081512  | -1.49177254 | 6.77084394  |
| 6 | -0.28295858 | 3.46462171  | -2.6355197  | 6 | 2.88818366  | -1.43912984 | 5.57933036  |
| 6 | -0.54758474 | 2.17936897  | -3.46944189 | 7 | 1.54295856  | -1.4935218  | 5.59970363  |
| 6 | 0.69615202  | 1.63363287  | -3.86314847 | 6 | 0.85364614  | -1.68303345 | 6.74048872  |
| 6 | 0.80413386  | 0.26843131  | -4.15894429 | 6 | 1.52679541  | -1.74915613 | 7.95365495  |
| 6 | 1.99947218  | -0.45809872 | -3.80081426 | 1 | 3.46398474  | -1.70389874 | 8.92137213  |
| 6 | 1.60753757  | -1.78364654 | -3.43100714 | 1 | 4.68636409  | -1.41883434 | 6.7318557   |
| 6 | 2.22793307  | -2.40333749 | -2.37580562 | 1 | 3.35356391  | -1.33158039 | 4.60306823  |
| 6 | 1.530006    | -3.41360471 | -1.46246803 | 1 | -0.22576412 | -1.73975005 | 6.63668453  |
| 6 | 2.01420542  | -2.91543524 | -0.07110444 | 1 | 0.94648127  | -1.87595587 | 8.86595942  |
| 6 | 1.23031693  | -2.83151737 | 1.083858    | 8 | 0.85621556  | -2.25850333 | 4.3528396   |
| 6 | 1.50638645  | -1.83023996 | 2.07613276  |   |             |             |             |
| 6 | 0.53163152  | -1.52842632 | 3.20694945  |   |             |             |             |

Transition state TS1c, C<sub>70</sub>(CF<sub>3</sub>)<sub>8</sub>(O)<sub>2</sub>...O...Py

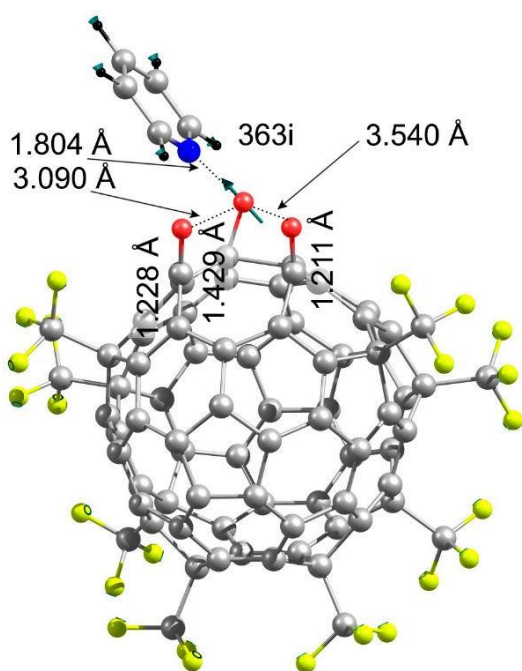

| N | X           | Y           | Z           |
|---|-------------|-------------|-------------|
| 6 | 0.18148843  | 2.45275655  | 2.16826295  |
| 6 | 1.5699371   | 2.34132988  | 2.02879769  |
| 6 | 2.47774998  | 1.58387604  | 2.978091    |
| 6 | 0.63621089  | -0.34887791 | 3.9145267   |
| 6 | -0.60943189 | 0.03380883  | 3.19990458  |
| 6 | -0.92426651 | 1.4604448   | 2.9389945   |
| 6 | -2.10949118 | 1.62058155  | 2.01704128  |
| 6 | -1.92211809 | 2.69811384  | 1.09134742  |
| 6 | -0.55732687 | 3.1564738   | 1.17513019  |
| 6 | 0.0918039   | 3.64345069  | 0.02936901  |
| 6 | 1.47468276  | 3.41425299  | -0.17347535 |
| 6 | 2.19733004  | 2.74607068  | 0.8038623   |
| 6 | 3.54181911  | 2.14190747  | 0.42221738  |
| 6 | 3.73027457  | 0.76911371  | 1.10324388  |
| 6 | 3.0829787   | 0.39016332  | 2.26961996  |
| 6 | 2.71306564  | -1.00333027 | 2.46940721  |
| 6 | 1.45274698  | -1.34050135 | 3.11932669  |
| 6 | 0.72840367  | -2.42976547 | 2.66761878  |
| 6 | -0.80695909 | -2.45076104 | 2.65838569  |
| 6 | -1.3558604  | -1.02902656 | 2.62454423  |
| 6 | -2.52598129 | -0.81999546 | 1.91191306  |
| 6 | -2.86456238 | 0.52327083  | 1.58641483  |
| 6 | -3.54424346 | 0.53957925  | 0.31360874  |
| 6 | -3.43054405 | 1.64475803  | -0.53806548 |
| 6 | -2.59518717 | 2.75480731  | -0.13981717 |
| 6 | -1.91466009 | 3.2404302   | -1.32494605 |
| 6 | -0.5883691  | 3.67599211  | -1.24151352 |

| N | X           | Y           | Z           |
|---|-------------|-------------|-------------|
| 6 | 0.36914736  | 3.37350227  | -2.26168119 |
| 6 | 1.78605961  | 3.42914421  | -1.69043091 |
| 6 | 2.57847631  | 2.169515    | -2.03991104 |
| 6 | 3.47692799  | 1.70326325  | -1.07462708 |
| 6 | 3.99403996  | 0.39102159  | -1.17601047 |
| 6 | 4.15920104  | -0.17560155 | 0.14147512  |
| 6 | 3.97551757  | -1.53354378 | 0.3671202   |
| 6 | 3.23131568  | -1.94761918 | 1.52762102  |
| 6 | 2.48915681  | -3.11822187 | 1.13834388  |
| 6 | 1.21685492  | -3.30065072 | 1.66596543  |
| 6 | 0.11637281  | -3.71623463 | 0.82869001  |
| 6 | -1.08241524 | -3.12180452 | 1.28344446  |
| 6 | -2.06558466 | -2.73829699 | 0.3682025   |
| 6 | -3.15117418 | -1.78867186 | 0.88519516  |
| 6 | -3.56646111 | -0.79914798 | -0.20005572 |
| 6 | -3.37587151 | -1.01485399 | -1.54165051 |
| 6 | -3.16852337 | 0.10324691  | -2.41161374 |
| 6 | -3.24094037 | 1.42050483  | -1.94674234 |
| 6 | -2.301015   | 2.41365049  | -2.43549892 |
| 6 | -1.32706817 | 2.05460689  | -3.3749152  |
| 6 | 0.0079297   | 2.56460459  | -3.30961311 |
| 6 | 0.97489215  | 1.61371339  | -4.01921441 |
| 6 | 2.19184214  | 1.31338434  | -3.13863122 |
| 6 | 2.71796626  | 0.02329749  | -3.22096568 |
| 6 | 3.62413833  | -0.4398099  | -2.23967229 |
| 6 | 3.45638539  | -1.85891286 | -2.02374369 |
| 6 | 3.64767837  | -2.40439383 | -0.74801291 |
| 6 | 2.72305299  | -3.38606413 | -0.2693153  |
| 6 | 1.65643274  | -3.77033474 | -1.0932354  |
| 6 | 0.33170316  | -3.9297825  | -0.5375668  |
| 6 | -0.64982105 | -3.54141681 | -1.47711312 |
| 6 | -1.83900823 | -2.95496487 | -1.04251108 |
| 6 | -2.6785767  | -2.25497964 | -2.1096162  |
| 6 | -1.73397558 | -1.59870707 | -3.15583363 |
| 6 | -2.15733038 | -0.2667303  | -3.37338135 |
| 6 | -1.25245742 | 0.69196845  | -3.84659225 |
| 6 | 0.09144524  | 0.33356428  | -4.10278192 |
| 6 | 0.51670243  | -0.97770483 | -3.90125666 |
| 6 | 2.02567367  | -1.20636789 | -3.87221575 |
| 6 | 2.39749121  | -2.30550725 | -2.87528211 |
| 6 | 1.50840427  | -3.24547693 | -2.41475524 |
| 6 | 0.04405361  | -3.31440534 | -2.85320439 |
| 6 | -0.41626178 | -1.97075276 | -3.41972679 |
| 6 | 4.7497838   | 3.06139565  | 0.80117675  |
| 9 | 5.00606828  | 2.96666218  | 2.13467076  |
| 9 | 5.87382911  | 2.68302069  | 0.13912161  |

| N | X           | Y           | Z           | N | X           | Y           | Z           |
|---|-------------|-------------|-------------|---|-------------|-------------|-------------|
| 9 | 4.52572286  | 4.3671459   | 0.53978258  | 9 | 3.94180397  | -1.73289123 | -5.22285288 |
| 6 | -1.32888372 | -3.25242658 | 3.8834778   | 9 | 2.04780333  | -2.71519071 | -5.73702158 |
| 9 | -0.82624934 | -2.7317639  | 5.03971731  | 6 | -0.15014368 | -4.52397924 | -3.86042004 |
| 9 | -2.67688224 | -3.22992878 | 3.99072453  | 9 | -0.66504058 | -5.61014301 | -3.22845864 |
| 9 | -0.93865228 | -4.55245173 | 3.81876117  | 9 | -0.96382188 | -4.20831246 | -4.89402123 |
| 6 | 2.49666162  | 4.72518673  | -2.19422961 | 9 | 1.03805678  | -4.91217177 | -4.39448142 |
| 9 | 1.92586027  | 5.83064429  | -1.64816566 | 8 | 0.99873994  | 0.09385582  | 5.00058921  |
| 9 | 3.81628451  | 4.74726143  | -1.90306678 | 8 | 2.76212682  | 1.96999002  | 4.08990693  |
| 9 | 2.38994675  | 4.82965336  | -3.54415763 | 6 | -3.19636847 | 2.28650244  | 7.75968285  |
| 6 | -4.42217485 | -2.54687233 | 1.44269522  | 6 | -1.99306735 | 1.58429798  | 7.66897064  |
| 9 | -4.14633293 | -3.82582129 | 1.79539971  | 6 | -1.3065714  | 1.56429394  | 6.45337258  |
| 9 | -4.93080825 | -1.91199167 | 2.53216337  | 7 | -1.82652384 | 2.20124381  | 5.40077988  |
| 9 | -5.4192505  | -2.59508729 | 0.52046359  | 6 | -2.96282296 | 2.90256415  | 5.44885299  |
| 6 | 1.35274887  | 2.19637877  | -5.44580472 | 6 | -3.68962732 | 2.95690639  | 6.63680603  |
| 9 | 1.06916004  | 3.52195736  | -5.52766383 | 1 | -3.74464603 | 2.31850202  | 8.70121985  |
| 9 | 2.66983945  | 2.05395329  | -5.72535786 | 1 | -1.57564865 | 1.05688439  | 8.52551183  |
| 9 | 0.64065314  | 1.58742273  | -6.42913217 | 1 | -0.35905097 | 1.04549074  | 6.27478112  |
| 6 | -3.72559643 | -3.20850835 | -2.75671814 | 1 | -3.26875354 | 3.40805643  | 4.53373109  |
| 9 | -4.61125377 | -3.65492908 | -1.83249346 | 1 | -4.62004745 | 3.52163931  | 6.67291797  |
| 9 | -4.42770513 | -2.5655887  | -3.72744069 | 8 | -0.74605904 | 2.42859729  | 3.97440043  |
| 9 | -3.14893949 | -4.29637364 | -3.31868554 |   |             |             |             |
| 6 | 2.59456854  | -1.56127597 | -5.27749987 |   |             |             |             |
| 9 | 2.33939683  | -0.60075247 | -6.1944959  |   |             |             |             |

**Compound 2a,  $C_s-C_{70}(CF_3)_8(O)_3$**

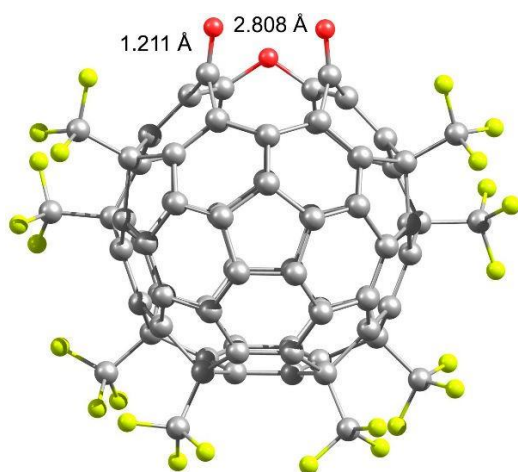

| N | X           | Y           | Z          |
|---|-------------|-------------|------------|
| 6 | -1.16080954 | 1.004819    | 3.95583833 |
| 6 | -0.05395016 | 1.84205267  | 3.80555266 |
| 6 | 1.28183042  | 1.36895271  | 4.34886505 |
| 6 | 1.28441056  | -1.69035445 | 4.23662541 |
| 6 | -0.05414928 | -2.09838536 | 3.65480482 |

| N | X           | Y           | Z          |
|---|-------------|-------------|------------|
| 6 | -1.15948936 | -1.27333562 | 3.86854304 |
| 6 | -2.29751938 | -1.33132343 | 3.0229871  |
| 6 | -2.99146302 | -0.08857094 | 2.70264441 |
| 6 | -2.2980174  | 1.12773127  | 3.11618166 |
| 6 | -2.34717474 | 2.26675752  | 2.27788796 |
| 6 | -1.23487258 | 3.13666682  | 2.121932   |
| 6 | -0.07069021 | 2.87135418  | 2.82080307 |
| 6 | 1.25377623  | 3.3789912   | 2.29042264 |
| 6 | 2.31952516  | 2.25714059  | 2.36530421 |
| 6 | 2.2643461   | 1.15895818  | 3.2126606  |
| 6 | 2.86652708  | -0.1089057  | 2.7904379  |
| 6 | 2.2729851   | -1.40733057 | 3.12120974 |
| 6 | 2.32817021  | -2.44161278 | 2.19563145 |
| 6 | 1.24247073  | -3.53210684 | 2.02475187 |
| 6 | -0.07410707 | -3.04587488 | 2.59194472 |
| 6 | -1.23640545 | -3.25327415 | 1.87743182 |
| 6 | -2.3497116  | -2.40431872 | 2.10236196 |
| 6 | -3.14486933 | -2.33388405 | 0.91166467 |
| 6 | -3.87837951 | -1.17952877 | 0.64634902 |



| N | X           | Y           | Z           | N | X           | Y           | Z           |
|---|-------------|-------------|-------------|---|-------------|-------------|-------------|
| 6 | -3.79860796 | -0.04718033 | 1.5505094   | 6 | 1.2564796   | 1.65289382  | -3.10279321 |
| 6 | -3.87578838 | 1.14801639  | 0.73264049  | 6 | 2.41862581  | 0.78522444  | -2.61620561 |
| 6 | -3.1367102  | 2.27636651  | 1.08166657  | 6 | 2.4180053   | -0.58678719 | -2.66891455 |
| 6 | -2.46695287 | 3.07568552  | 0.10243984  | 6 | 1.25926798  | -1.4137927  | -3.23046807 |
| 6 | -1.32706448 | 3.85338114  | 0.75254915  | 6 | -0.03555785 | -0.59968983 | -3.22805296 |
| 6 | -0.01690075 | 3.63989477  | -0.01204283 | 6 | 1.79876042  | 4.61390488  | 3.07897676  |
| 6 | 1.15603586  | 3.55926958  | 0.74576202  | 9 | 2.19959085  | 4.22132951  | 4.31997034  |
| 6 | 2.32689142  | 3.01738715  | 0.16561672  | 9 | 2.87370539  | 5.15431825  | 2.44907001  |
| 6 | 3.04297612  | 2.241993    | 1.15020115  | 9 | 0.88029684  | 5.58555608  | 3.24856265  |
| 6 | 3.7711157   | 1.11911556  | 0.79100314  | 6 | 1.70971198  | -4.86734948 | 2.67064742  |
| 6 | 3.66812433  | -0.06309002 | 1.60529841  | 9 | 1.94817905  | -4.6882458  | 3.99663518  |
| 6 | 3.77195005  | -1.18046252 | 0.70418936  | 9 | 0.77718313  | -5.83996301 | 2.54742666  |
| 6 | 3.04455614  | -2.32773368 | 0.97922548  | 9 | 2.85728708  | -5.31470877 | 2.09977225  |
| 6 | 2.3195485   | -3.0149866  | -0.06251276 | 6 | -1.72371278 | 5.35810505  | 0.84647909  |
| 6 | 1.14505635  | -3.58767545 | 0.47558306  | 9 | -2.81907904 | 5.51402278  | 1.6352717   |
| 6 | -0.02852394 | -3.6136219  | -0.28091743 | 9 | -0.73582834 | 6.12961305  | 1.34708788  |
| 6 | -1.3370812  | -3.8893588  | 0.47111957  | 9 | -2.02557624 | 5.84463915  | -0.38518607 |
| 6 | -2.47752047 | -3.06668135 | -0.12210331 | 6 | -1.71824619 | -5.42480894 | 0.52842069  |
| 6 | -2.47923226 | -2.56973115 | -1.40045424 | 9 | -0.67362315 | -6.22071938 | 0.2005926   |
| 6 | -3.18329803 | -1.35678692 | -1.68361632 | 9 | -2.1385127  | -5.77403127 | 1.77235641  |
| 6 | -3.92737545 | -0.68942174 | -0.70288301 | 9 | -2.73215462 | -5.71491318 | -0.3258756  |
| 6 | -3.92548666 | 0.75782858  | -0.64900093 | 6 | -1.69207537 | 4.07425042  | -3.19557679 |
| 6 | -3.18248798 | 1.49349978  | -1.57978621 | 9 | -2.78162842 | 4.76596156  | -2.77254005 |
| 6 | -2.47174272 | 2.67718023  | -1.20824251 | 9 | -0.68887552 | 4.96711224  | -3.36017612 |
| 6 | -1.30816854 | 2.92499407  | -2.16920948 | 9 | -2.00994451 | 3.56010554  | -4.41139581 |
| 6 | -0.01427865 | 3.19579928  | -1.39162024 | 6 | -1.65179023 | -3.81417195 | -3.43998767 |
| 6 | 1.16038763  | 2.68890587  | -1.94790465 | 9 | -1.87643032 | -5.01540667 | -2.85028882 |
| 6 | 2.33706415  | 2.60001604  | -1.16882588 | 9 | -2.77285407 | -3.4706725  | -4.12590452 |
| 6 | 3.12055165  | 1.45220533  | -1.56350207 | 9 | -0.65358737 | -3.98506398 | -4.33626363 |
| 6 | 3.85179821  | 0.73644595  | -0.60715438 | 6 | 1.62179136  | 2.30161344  | -4.47090361 |
| 6 | 3.85122476  | -0.69155064 | -0.66139612 | 9 | 0.66678098  | 3.15526561  | -4.90352678 |
| 6 | 3.12152762  | -1.33164355 | -1.6711916  | 9 | 2.78552109  | 2.9968406   | -4.37649262 |
| 6 | 2.33365932  | -2.50231389 | -1.36314763 | 9 | 1.78107494  | 1.35055938  | -5.42463025 |
| 6 | 1.15565933  | -2.52575928 | -2.14442827 | 6 | 1.64926894  | -1.97484391 | -4.66094172 |
| 6 | -0.01752824 | -3.06528862 | -1.61987941 | 9 | 2.08076432  | -3.25977648 | -4.5791608  |
| 6 | -1.30714292 | -2.73621889 | -2.3704016  | 9 | 0.61455224  | -1.92778418 | -5.53054582 |
| 6 | -1.21118821 | -1.29794295 | -2.95373494 | 9 | 2.66373008  | -1.2556008  | -5.20761463 |
| 6 | -2.39551677 | -0.59669902 | -2.62544797 | 8 | 1.53259555  | -1.61315448 | 5.41964095  |
| 6 | -2.39531148 | 0.80291007  | -2.57410719 | 8 | 1.52891772  | 1.19319497  | 5.52136919  |
| 6 | -1.20896755 | 1.52454541  | -2.84405166 | 8 | -1.00295227 | -0.16390957 | 4.69670433  |
| 6 | -0.03734605 | 0.84497249  | -3.16861622 |   |             |             |             |

Transition state TS1d, C<sub>70</sub>(CF<sub>3</sub>)<sub>8</sub>(O)<sub>2</sub>...O...Py

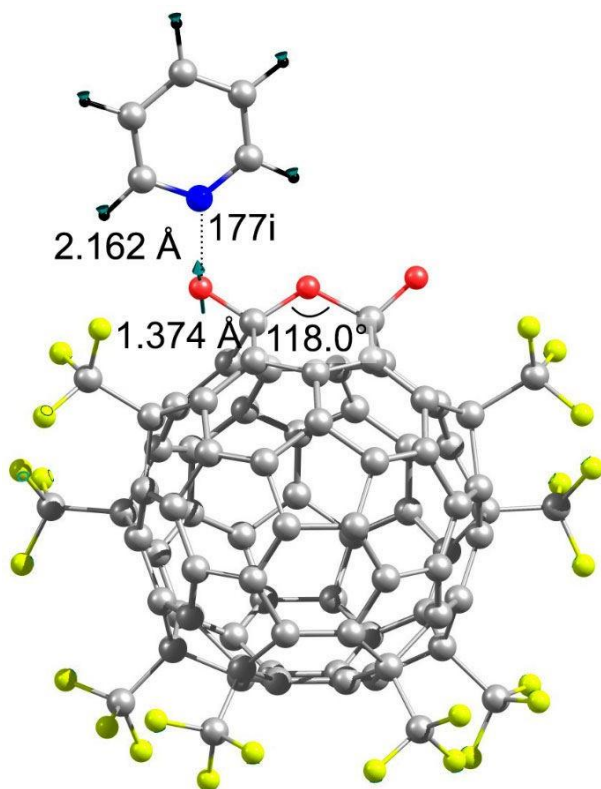

| N | X           | Y           | Z           |
|---|-------------|-------------|-------------|
| 6 | -0.75545933 | 3.03317434  | 1.34622892  |
| 6 | 0.60288686  | 2.8324644   | 1.70368155  |
| 6 | 1.03243472  | 2.23353126  | 3.03244091  |
| 6 | -0.85276762 | 0.73228782  | 3.50746493  |
| 6 | -1.87324866 | 0.91806172  | 2.38136963  |
| 6 | -1.88890708 | 2.15188088  | 1.64993716  |
| 6 | -2.8172018  | 2.26202474  | 0.5591085   |
| 6 | -2.32133866 | 3.21251346  | -0.40262682 |
| 6 | -1.04459516 | 3.66392996  | 0.08370917  |
| 6 | -0.00938546 | 3.89913424  | -0.8290471  |
| 6 | 1.3458425   | 3.57590191  | -0.50048737 |
| 6 | 1.6528701   | 3.06162406  | 0.74354459  |
| 6 | 3.01801706  | 2.40332023  | 0.94390093  |
| 6 | 2.90606523  | 1.17153928  | 1.86528636  |
| 6 | 1.88525497  | 0.99345851  | 2.77964984  |
| 6 | 1.40841598  | -0.34201105 | 3.05854262  |
| 6 | -0.0111404  | -0.50276893 | 3.29026367  |
| 6 | -0.66052979 | -1.63150199 | 2.82209732  |
| 6 | -2.1190961  | -1.64493595 | 2.31998575  |
| 6 | -2.55012483 | -0.25465741 | 1.86605485  |
| 6 | -3.35403647 | -0.14040772 | 0.75731099  |
| 6 | -3.50587148 | 1.1251458   | 0.10900112  |
| 6 | -3.74643782 | 0.91994024  | -1.29460934 |
| 6 | -3.27316016 | 1.8583245   | -2.22654187 |

| N | X           | Y           | Z           |
|---|-------------|-------------|-------------|
| 6 | -2.54588338 | 3.02745031  | -1.7712281  |
| 6 | -1.47902676 | 3.2829509   | -2.71218157 |
| 6 | -0.2239622  | 3.70115946  | -2.23753931 |
| 6 | 0.99437369  | 3.19712547  | -2.80518824 |
| 6 | 2.14002531  | 3.32824739  | -1.80354015 |
| 6 | 2.91563972  | 2.01779785  | -1.66863158 |
| 6 | 3.40560454  | 1.70793884  | -0.39860902 |
| 6 | 3.84598497  | 0.3949528   | -0.11741688 |
| 6 | 3.55052874  | 0.0645972   | 1.2557629   |
| 6 | 3.22813187  | -1.2415655  | 1.61730485  |
| 6 | 2.1287646   | -1.44639614 | 2.51846307  |
| 6 | 1.44700764  | -2.63690905 | 2.09136288  |
| 6 | 0.05883441  | -2.68085301 | 2.1921836   |
| 6 | -0.73783327 | -3.21346627 | 1.11225362  |
| 6 | -1.97321978 | -2.53201883 | 1.04223788  |
| 6 | -2.58094071 | -2.3147053  | -0.19694141 |
| 6 | -3.6982862  | -1.27026035 | -0.23780673 |
| 6 | -3.68701694 | -0.49185351 | -1.55343117 |
| 6 | -3.07822532 | -0.94395332 | -2.69938011 |
| 6 | -2.51660387 | 0.00302865  | -3.61453775 |
| 6 | -2.64621744 | 1.38435632  | -3.42854268 |
| 6 | -1.5305955  | 2.26635895  | -3.72980055 |
| 6 | -0.33060518 | 1.73136504  | -4.20473471 |
| 6 | 0.94096536  | 2.2249652   | -3.76958066 |
| 6 | 2.01904116  | 1.15542176  | -3.95686638 |
| 6 | 2.85447977  | 0.9928615   | -2.68537928 |
| 6 | 3.28690631  | -0.2993667  | -2.38509672 |
| 6 | 3.79029537  | -0.60058481 | -1.09958423 |
| 6 | 3.46787841  | -1.96160465 | -0.73371611 |
| 6 | 3.20210568  | -2.28186939 | 0.6035013   |
| 6 | 2.09921629  | -3.14839008 | 0.89860059  |
| 6 | 1.32871966  | -3.64780775 | -0.15932183 |
| 6 | -0.11222489 | -3.67365426 | -0.05273291 |
| 6 | -0.70789021 | -3.4468985  | -1.31436097 |
| 6 | -1.93100729 | -2.78217926 | -1.40257942 |
| 6 | -2.32196045 | -2.27258976 | -2.79061766 |
| 6 | -1.04016096 | -1.81816211 | -3.54488908 |
| 6 | -1.27303194 | -0.54451361 | -4.10760535 |
| 6 | -0.19908544 | 0.3047542   | -4.39915679 |
| 6 | 1.12515599  | -0.10848192 | -4.13257164 |
| 6 | 1.36709993  | -1.3724633  | -3.59304151 |
| 6 | 2.7631895   | -1.61362671 | -3.02862008 |
| 6 | 2.7120578   | -2.53250798 | -1.80541305 |
| 6 | 1.65589011  | -3.36566824 | -1.52196371 |
| 6 | 0.40890854  | -3.48151002 | -2.40066678 |
| 6 | 0.26180021  | -2.25032047 | -3.29433699 |

| N | X           | Y           | Z           | N | X           | Y           | Z           |
|---|-------------|-------------|-------------|---|-------------|-------------|-------------|
| 6 | 4.13464094  | 3.39077372  | 1.48441671  | 6 | 3.73445323  | -2.20152332 | -4.09540773 |
| 9 | 4.46098815  | 3.12402433  | 2.76856996  | 9 | 3.82846878  | -1.4141353  | -5.19157548 |
| 9 | 5.28309333  | 3.25320858  | 0.75723693  | 9 | 4.98287583  | -2.34779192 | -3.58073009 |
| 9 | 3.75292528  | 4.6843505   | 1.41492833  | 9 | 3.31175475  | -3.42129771 | -4.51167465 |
| 6 | -3.06410782 | -2.27838786 | 3.42018069  | 6 | 0.44385833  | -4.8408286  | -3.20973438 |
| 9 | -2.45437016 | -2.30632919 | 4.64023773  | 9 | -0.2362195  | -5.81550973 | -2.55142827 |
| 9 | -4.21973715 | -1.59398953 | 3.57363803  | 9 | -0.08787248 | -4.71562535 | -4.44835958 |
| 9 | -3.3714162  | -3.56692041 | 3.12054206  | 9 | 1.71559605  | -5.28772757 | -3.36562068 |
| 6 | 3.05924827  | 4.52049694  | -2.20020223 | 8 | -0.14342681 | 1.87486154  | 3.85023819  |
| 9 | 2.34094246  | 5.67094997  | -2.29341044 | 8 | 1.61531879  | 3.29185603  | 3.57081632  |
| 9 | 4.04935864  | 4.72279638  | -1.30411533 | 6 | -1.58848922 | 1.03917894  | 9.07549027  |
| 9 | 3.64049916  | 4.2967987   | -3.40671897 | 6 | -0.82287714 | 1.87661124  | 8.26254365  |
| 6 | -5.1151887  | -1.8587332  | 0.04282146  | 6 | -0.8291159  | 1.66945149  | 6.88033653  |
| 9 | -5.15238373 | -2.54152957 | 1.21140212  | 7 | -1.54310652 | 0.67311461  | 6.34646815  |
| 9 | -6.03555648 | -0.85886072 | 0.11827968  | 6 | -2.29666729 | -0.13099737 | 7.09928335  |
| 9 | -5.51113056 | -2.70605409 | -0.93292377 | 6 | -2.3397223  | 0.01962405  | 8.4873474   |
| 6 | 2.88376637  | 1.49591945  | -5.24130309 | 1 | -1.60570788 | 1.18385174  | 10.15605338 |
| 9 | 2.77219991  | 2.80917142  | -5.57130299 | 1 | -0.22731671 | 2.68779527  | 8.68000225  |
| 9 | 4.19950799  | 1.24371266  | -5.05864286 | 1 | -0.26308221 | 2.29238511  | 6.18545285  |
| 9 | 2.45810924  | 0.78587776  | -6.318672   | 1 | -2.8646161  | -0.90224294 | 6.57812426  |
| 6 | -3.14672411 | -3.3083912  | -3.62442107 | 1 | -2.95581255 | -0.65125972 | 9.08514028  |
| 9 | -4.4267743  | -3.38768262 | -3.19268871 | 8 | -2.01614663 | 0.68013959  | 4.2370054   |
| 9 | -3.18299422 | -2.94178922 | -4.93411638 |   |             |             |             |
| 9 | -2.62035729 | -4.55246818 | -3.55383318 |   |             |             |             |

**Compound 5, ester C<sub>70</sub>(CF<sub>3</sub>)<sub>8</sub>(O)<sub>3</sub>**

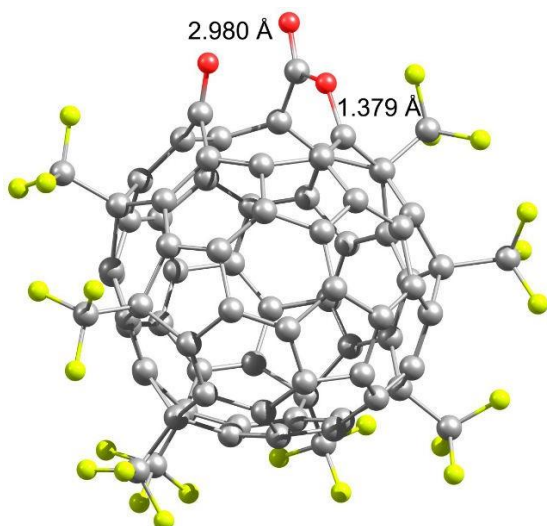

| N | X           | Y          | Z          |
|---|-------------|------------|------------|
| 6 | -0.82772728 | 3.22276504 | 2.0814049  |
| 6 | 0.54067998  | 3.05149114 | 2.39878825 |

| N | X           | Y           | Z           |
|---|-------------|-------------|-------------|
| 6 | 0.99632704  | 2.44626258  | 3.7068857   |
| 6 | -0.70963249 | 0.60319255  | 5.18239375  |
| 6 | -2.12648771 | 1.23471379  | 3.29052704  |
| 6 | -2.01191857 | 2.36060335  | 2.44673285  |
| 6 | -2.90219908 | 2.40914348  | 1.33707223  |
| 6 | -2.41834982 | 3.3182312   | 0.33890548  |
| 6 | -1.13178549 | 3.77475376  | 0.7878794   |
| 6 | -0.12659281 | 4.00045036  | -0.16674024 |
| 6 | 1.2248649   | 3.70253422  | 0.12553769  |
| 6 | 1.5458557   | 3.22063789  | 1.38902576  |
| 6 | 2.90297324  | 2.55290609  | 1.56853066  |
| 6 | 2.81011377  | 1.34927955  | 2.52460691  |
| 6 | 1.84160786  | 1.21175048  | 3.50595552  |
| 6 | 1.40240444  | -0.12176797 | 3.89075092  |
| 6 | 0.01173362  | -0.32902949 | 4.2765116   |
| 6 | -0.70606106 | -1.37311251 | 3.71265283  |
| 6 | -2.19977205 | -1.38052262 | 3.25581541  |
| 6 | -2.6942994  | 0.00535989  | 2.79325125  |

| N | X           | Y           | Z           | N | X           | Y           | Z           |
|---|-------------|-------------|-------------|---|-------------|-------------|-------------|
| 6 | -3.47915459 | 0.05988986  | 1.64586319  | 6 | 1.13127411  | -1.35712223 | -2.78918201 |
| 6 | -3.65203369 | 1.28716159  | 0.95966338  | 6 | 2.54201447  | -1.58562456 | -2.25413709 |
| 6 | -3.9138679  | 1.04183311  | -0.43793287 | 6 | 2.5204903   | -2.45740202 | -0.99810506 |
| 6 | -3.45720415 | 1.94265001  | -1.41138259 | 6 | 1.46722337  | -3.26963227 | -0.65500845 |
| 6 | -2.69661405 | 3.11068467  | -1.01001442 | 6 | 0.19675193  | -3.41321004 | -1.49515629 |
| 6 | -1.65498556 | 3.33551778  | -1.99237502 | 6 | 0.02741793  | -2.2183449  | -2.43242814 |
| 6 | -0.38947859 | 3.76359777  | -1.56922056 | 6 | 3.97287902  | 3.54271579  | 2.13731183  |
| 6 | 0.8072605   | 3.24042667  | -2.15542746 | 9 | 3.73445955  | 3.75918607  | 3.46119103  |
| 6 | 1.98359106  | 3.40001361  | -1.1920214  | 9 | 5.2223594   | 3.02673085  | 2.02021258  |
| 6 | 2.75046505  | 2.08993454  | -1.02935825 | 9 | 3.95463276  | 4.74940066  | 1.53504273  |
| 6 | 3.27960824  | 1.82655412  | 0.23803543  | 6 | -3.09526872 | -1.99584248 | 4.36965996  |
| 6 | 3.72269569  | 0.52116137  | 0.55268528  | 9 | -2.96914847 | -1.27897633 | 5.51834021  |
| 6 | 3.46033707  | 0.23308874  | 1.94267197  | 9 | -4.40385421 | -1.99750247 | 4.03231271  |
| 6 | 3.14202614  | -1.05532896 | 2.35541508  | 9 | -2.72939661 | -3.27493365 | 4.63916767  |
| 6 | 2.07929804  | -1.22294984 | 3.30568599  | 6 | 2.90629879  | 4.55839735  | -1.69344056 |
| 6 | 1.37064509  | -2.41637885 | 2.93187956  | 9 | 2.28358589  | 5.75782893  | -1.56494728 |
| 6 | -0.01456609 | -2.42084051 | 3.05254497  | 9 | 4.08003932  | 4.6185415   | -1.02764891 |
| 6 | -0.84772084 | -2.98181761 | 2.0288858   | 9 | 3.20647626  | 4.38577615  | -3.00655871 |
| 6 | -2.0793241  | -2.29400885 | 1.98312753  | 6 | -5.27110025 | -1.72335662 | 1.00352616  |
| 6 | -2.71540554 | -2.12547032 | 0.74966991  | 9 | -5.18197935 | -2.94202823 | 1.58513198  |
| 6 | -3.84482729 | -1.10395749 | 0.69574541  | 9 | -5.9869503  | -0.9132153  | 1.82479443  |
| 6 | -3.86413146 | -0.37346213 | -0.64797408 | 9 | -5.99646478 | -1.87191011 | -0.13349691 |
| 6 | -3.28465579 | -0.86628502 | -1.7893499  | 6 | 2.6164562   | 1.42505264  | -4.58664817 |
| 6 | -2.74641193 | 0.03986911  | -2.7593493  | 9 | 2.45903285  | 2.70607754  | -5.00724741 |
| 6 | -2.8611003  | 1.4262934   | -2.61285062 | 9 | 3.94271183  | 1.22312021  | -4.40944418 |
| 6 | -1.74639485 | 2.28907472  | -2.97253654 | 9 | 2.19460815  | 0.62874979  | -5.60192066 |
| 6 | -0.56242072 | 1.73123705  | -3.46599243 | 6 | -3.42005746 | -3.26944284 | -2.55324225 |
| 6 | 0.72131937  | 2.23380112  | -3.08424726 | 9 | -4.58117653 | -3.45200128 | -1.8755965  |
| 6 | 1.78657445  | 1.14993811  | -3.26132892 | 9 | -3.73157737 | -2.87749968 | -3.81561569 |
| 6 | 2.65652618  | 1.02973195  | -2.00710099 | 9 | -2.80693804 | -4.4722109  | -2.63146258 |
| 6 | 3.09227824  | -0.25307997 | -1.6726071  | 6 | 3.48154797  | -2.22628607 | -3.31944924 |
| 6 | 3.63257158  | -0.50928295 | -0.39213242 | 9 | 3.58303659  | -1.46993904 | -4.43503152 |
| 6 | 3.31221046  | -1.85501024 | 0.0299593   | 9 | 4.73260234  | -2.39423819 | -2.81688977 |
| 6 | 3.08333139  | -2.13032611 | 1.38282329  | 9 | 3.01681721  | -3.44392682 | -3.69477303 |
| 6 | 1.98414031  | -2.97658505 | 1.74151856  | 6 | 0.21459271  | -4.80863284 | -2.24714443 |
| 6 | 1.17698264  | -3.50172497 | 0.72569141  | 9 | -0.50501416 | -5.7369087  | -1.56606881 |
| 6 | -0.26021707 | -3.50685546 | 0.87193742  | 9 | -0.27951783 | -4.72237257 | -3.50265652 |
| 6 | -0.88681654 | -3.3262756  | -0.37921705 | 9 | 1.48009144  | -5.29116533 | -2.34884683 |
| 6 | -2.10067824 | -2.64630411 | -0.45172501 | 8 | -0.50066635 | 0.68452632  | 6.36065411  |
| 6 | -2.53672741 | -2.19900964 | -1.84544206 | 8 | 0.69116019  | 2.91706028  | 4.7864589   |
| 6 | -1.27939855 | -1.79051562 | -2.66590292 | 8 | -1.70162316 | 1.37010263  | 4.59551889  |
| 6 | -1.52052651 | -0.53204716 | -3.26435938 |   |             |             |             |
| 6 | -0.44778418 | 0.29912799  | -3.6132068  |   |             |             |             |
| 6 | 0.88102263  | -0.11325483 | -3.36441224 |   |             |             |             |

Transition state TS2d, C<sub>69</sub>O(CF<sub>3</sub>)<sub>8</sub>(O)...CO<sub>2</sub>Py

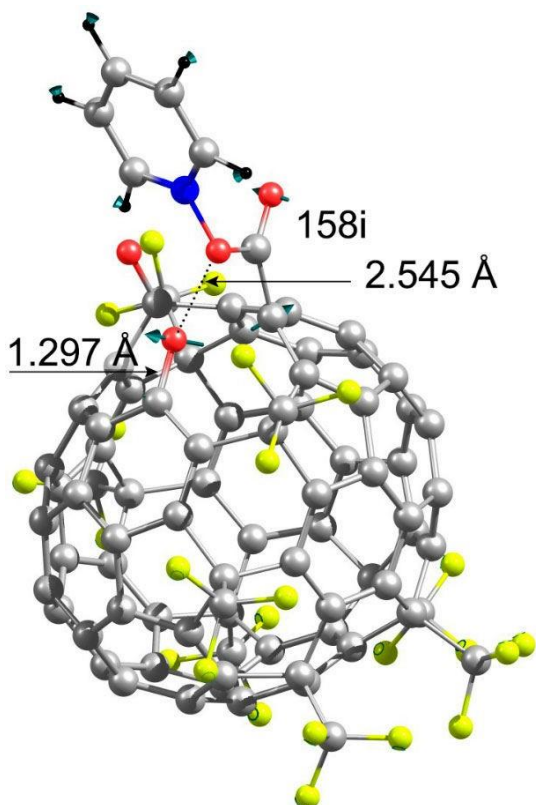

| N | X           | Y           | Z           |
|---|-------------|-------------|-------------|
| 6 | 0.19923157  | 3.17381703  | 1.05970391  |
| 6 | 1.46195193  | 2.63679537  | 1.40996816  |
| 6 | 1.73910285  | 1.96268889  | 2.74498826  |
| 6 | 0.13385674  | -0.08694773 | 5.03724752  |
| 6 | -1.40658054 | 1.56824954  | 2.26773987  |
| 6 | -1.14783577 | 2.69850187  | 1.44519426  |
| 6 | -2.03982568 | 3.00284341  | 0.38727777  |
| 6 | -1.33073768 | 3.70598941  | -0.65239365 |
| 6 | 0.04698902  | 3.77865296  | -0.23805727 |
| 6 | 1.06183186  | 3.67028559  | -1.19890009 |
| 6 | 2.27119507  | 2.99898724  | -0.89406837 |
| 6 | 2.45687521  | 2.48090015  | 0.38542302  |
| 6 | 3.56248139  | 1.45505234  | 0.57835369  |
| 6 | 3.13226519  | 0.35727941  | 1.57000446  |
| 6 | 2.16042324  | 0.51911573  | 2.55618265  |
| 6 | 1.40310042  | -0.62904484 | 2.99404421  |
| 6 | 0.03223098  | -0.46924527 | 3.59068372  |
| 6 | -0.99099052 | -1.25711998 | 2.95255307  |
| 6 | -2.4045531  | -0.82241985 | 2.42385468  |
| 6 | -2.4378498  | 0.61108498  | 1.88678959  |
| 6 | -3.23327312 | 0.89461776  | 0.77972825  |
| 6 | -3.07132426 | 2.10805799  | 0.05409348  |
| 6 | -3.4064525  | 1.89989825  | -1.33091421 |
| 6 | -2.7379605  | 2.60757616  | -2.34481572 |

| N | X           | Y           | Z           |
|---|-------------|-------------|-------------|
| 6 | -1.67269904 | 3.52557257  | -1.99294662 |
| 6 | -0.62256052 | 3.40467154  | -2.98627412 |
| 6 | 0.72068855  | 3.46903101  | -2.58969367 |
| 6 | 1.70764401  | 2.60336333  | -3.16019126 |
| 6 | 2.89265268  | 2.44859306  | -2.20519483 |
| 6 | 3.25549744  | 0.97953729  | -2.00529488 |
| 6 | 3.70179735  | 0.6137882   | -0.73195744 |
| 6 | 3.7588683   | -0.75279686 | -0.37734537 |
| 6 | 3.43906532  | -0.90898511 | 1.0227682   |
| 6 | 2.77395482  | -2.04317234 | 1.46944596  |
| 6 | 1.72419193  | -1.88446639 | 2.43189364  |
| 6 | 0.71421858  | -2.85883018 | 2.12859882  |
| 6 | -0.61004686 | -2.42422761 | 2.2593743   |
| 6 | -1.57600952 | -2.75980985 | 1.2450208   |
| 6 | -2.56677744 | -1.76436804 | 1.18420491  |
| 6 | -3.15633594 | -1.44931502 | -0.04653211 |
| 6 | -3.94384095 | -0.14229791 | -0.13017087 |
| 6 | -3.75994685 | 0.52169136  | -1.49494449 |
| 6 | -3.37098133 | -0.14946893 | -2.62310111 |
| 6 | -2.61745936 | 0.53452238  | -3.63172359 |
| 6 | -2.33074147 | 1.8991269   | -3.52921687 |
| 6 | -1.02306347 | 2.39499137  | -3.92699511 |
| 6 | -0.05564791 | 1.50735912  | -4.40953142 |
| 6 | 1.32361496  | 1.63390312  | -4.05255576 |
| 6 | 2.0329333   | 0.28631592  | -4.20027827 |
| 6 | 2.85092591  | -0.03931447 | -2.9475419  |
| 6 | 2.90714922  | -1.38277908 | -2.57331664 |
| 6 | 3.36839484  | -1.74393781 | -1.28707911 |
| 6 | 2.68616085  | -2.9332476  | -0.8234998  |
| 6 | 2.40556027  | -3.08873774 | 0.53785037  |
| 6 | 1.11805898  | -3.58006685 | 0.93966922  |
| 6 | 0.18656283  | -3.89142763 | -0.05948817 |
| 6 | -1.18428523 | -3.46505691 | 0.10102581  |
| 6 | -1.75744328 | -3.14823488 | -1.14720008 |
| 6 | -2.72982633 | -2.15290795 | -1.23379317 |
| 6 | -3.04149018 | -1.64199564 | -2.63898734 |
| 6 | -1.73496828 | -1.63751438 | -3.48592774 |
| 6 | -1.616106   | -0.38034616 | -4.12494235 |
| 6 | -0.35617726 | 0.09788062  | -4.50961264 |
| 6 | 0.80315404  | -0.66935484 | -4.25650231 |
| 6 | 0.69793978  | -1.91555716 | -3.64169167 |
| 6 | 1.99386118  | -2.5220848  | -3.11046286 |
| 6 | 1.74639892  | -3.32097922 | -1.82981231 |
| 6 | 0.50919413  | -3.78447365 | -1.44673392 |
| 6 | -0.76468842 | -3.57631116 | -2.27003618 |
| 6 | -0.60006465 | -2.41260476 | -3.24650354 |

| N | X           | Y           | Z           | N | X           | Y           | Z           |
|---|-------------|-------------|-------------|---|-------------|-------------|-------------|
| 6 | 4.88187855  | 2.10171098  | 1.110407    | 9 | 2.99178688  | -2.75941387 | -5.30480045 |
| 9 | 4.74871307  | 2.40267548  | 2.43479095  | 9 | 3.86322135  | -3.92525997 | -3.66941307 |
| 9 | 5.93157612  | 1.24779953  | 0.98939346  | 9 | 1.90957922  | -4.47622956 | -4.50270464 |
| 9 | 5.20558688  | 3.25440569  | 0.48497651  | 6 | -1.1687857  | -4.93230042 | -2.97693878 |
| 6 | -3.49799839 | -1.10497333 | 3.49150388  | 9 | -2.07837791 | -5.61811667 | -2.23531367 |
| 9 | -3.38728102 | -0.25669723 | 4.55587649  | 9 | -1.691154   | -4.73760153 | -4.21079367 |
| 9 | -4.75350872 | -0.96011803 | 3.01038342  | 9 | -0.09341633 | -5.74875713 | -3.12800297 |
| 9 | -3.39335526 | -2.37229915 | 3.97826718  | 8 | 1.07744041  | -0.25260804 | 5.75697119  |
| 6 | 4.0999779   | 3.2755129   | -2.74863661 | 8 | 1.7573256   | 2.56507823  | 3.81349953  |
| 9 | 3.84376263  | 4.60877174  | -2.68142839 | 8 | -0.56370184 | 1.36486698  | 3.23196576  |
| 9 | 5.24825381  | 3.03679154  | -2.0756448  | 6 | -0.28186385 | 2.79040723  | 8.92288961  |
| 9 | 4.33874374  | 2.96837103  | -4.05102177 | 6 | -1.08984553 | 1.6523118   | 9.01452239  |
| 6 | -5.49419811 | -0.3021017  | 0.16610697  | 6 | -1.32527785 | 0.89099958  | 7.88127969  |
| 9 | -5.81133199 | -1.54529327 | 0.59926951  | 7 | -0.78181155 | 1.285197    | 6.70708086  |
| 9 | -5.91920873 | 0.59272386  | 1.09707715  | 6 | 0.01495102  | 2.37420023  | 6.56743681  |
| 9 | -6.23597143 | -0.07198426 | -0.95114366 | 6 | 0.2741289   | 3.14524559  | 7.69064636  |
| 6 | 2.88579196  | 0.27685373  | -5.53768389 | 1 | -0.08541968 | 3.39448456  | 9.80770221  |
| 9 | 3.09361673  | 1.53785918  | -5.99997146 | 1 | -1.53509316 | 1.34235148  | 9.95767405  |
| 9 | 4.10461431  | -0.28743914 | -5.36640517 | 1 | -1.93232892 | -0.00975508 | 7.83855896  |
| 9 | 2.24180239  | -0.39399743 | -6.52808025 | 1 | 0.41326261  | 2.56612041  | 5.56602018  |
| 6 | -4.21793026 | -2.42541153 | -3.28946062 | 1 | 0.91536877  | 4.01760659  | 7.58162763  |
| 9 | -5.3718029  | -2.19898918 | -2.6066889  | 8 | -1.082227   | 0.54471259  | 5.58448149  |
| 9 | -4.4149598  | -2.03030947 | -4.5749334  |   |             |             |             |
| 9 | -4.01482705 | -3.76303449 | -3.295154   |   |             |             |             |
| 6 | 2.69881423  | -3.42566067 | -4.16364288 |   |             |             |             |

**Compound 2b, ketoester C<sub>69</sub>O(CF<sub>3</sub>)<sub>8</sub>(O)**

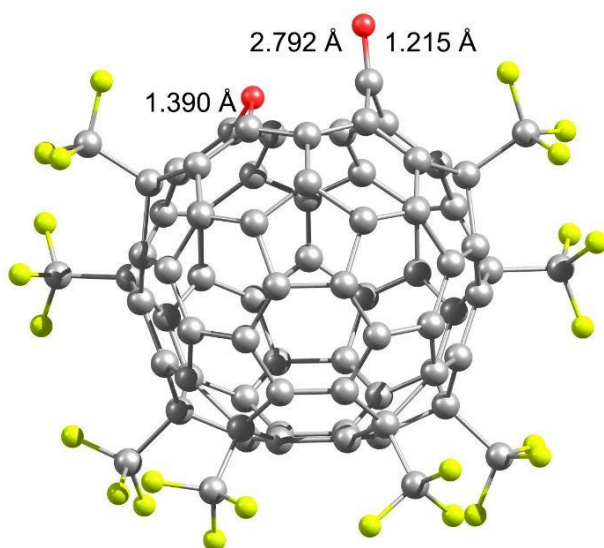

| N | X           | Y          | Z          | N | X           | Y           | Z           |
|---|-------------|------------|------------|---|-------------|-------------|-------------|
| 6 | -0.46697182 | 3.53784195 | 1.75136237 | 6 | -2.21216587 | 1.83789946  | 2.68858055  |
| 6 | 0.73583562  | 3.17933069 | 2.38813351 | 6 | -1.83408042 | 2.94892595  | 1.91389614  |
| 6 | 0.7677043   | 2.6579068  | 3.80535663 | 6 | -2.51079161 | 3.12152512  | 0.65962951  |
|   |             |            |            | 6 | -1.64456106 | 3.80024742  | -0.26994125 |
|   |             |            |            | 6 | -0.39236431 | 4.0174866   | 0.40316501  |
|   |             |            |            | 6 | 0.80924531  | 3.93439891  | -0.31945491 |
|   |             |            |            | 6 | 1.9756202   | 3.397101    | 0.27964848  |
|   |             |            |            | 6 | 1.93487331  | 3.01765963  | 1.61603089  |
|   |             |            |            | 6 | 3.02917621  | 2.08632827  | 2.13057996  |
|   |             |            |            | 6 | 2.44535762  | 1.04777704  | 3.10986637  |
|   |             |            |            | 6 | 1.27233607  | 1.23976523  | 3.81584141  |
|   |             |            |            | 6 | 0.41906532  | 0.10776286  | 4.09714598  |
|   |             |            |            | 6 | -1.01423092 | 0.27776182  | 3.97595792  |
|   |             |            |            | 6 | -1.83547497 | -0.75794737 | 3.59662267  |
|   |             |            |            | 6 | -3.13716282 | -0.52830726 | 2.82876238  |
|   |             |            |            | 6 | -3.11437863 | 0.84705758  | 2.1927185   |
|   |             |            |            | 6 | -3.6814884  | 0.99433623  | 0.93541157  |
|   |             |            |            | 6 | -3.40569295 | 2.15217415  | 0.17491835  |
|   |             |            |            | 6 | -3.43595256 | 1.82347505  | -1.23147878 |

| N | X           | Y           | Z           | N | X           | Y           | Z           |
|---|-------------|-------------|-------------|---|-------------|-------------|-------------|
| 6 | -2.59736888 | 2.49649935  | -2.12928878 | 6 | 1.97918147  | -2.99342231 | -0.13568447 |
| 6 | -1.68515345 | 3.50953075  | -1.63428892 | 6 | 0.72207714  | -3.52549625 | 0.00992221  |
| 6 | -0.44433757 | 3.4018137   | -2.37832558 | 6 | -0.34489587 | -3.49193915 | -1.08534721 |
| 6 | 0.7793148   | 3.5994035   | -1.72436474 | 6 | -0.03970641 | -2.39514153 | -2.10567659 |
| 6 | 1.91556876  | 2.77264924  | -2.00121191 | 6 | 4.17907155  | 2.85712502  | 2.85699164  |
| 6 | 2.88406886  | 2.78669724  | -0.81796453 | 9 | 3.75518907  | 3.25101646  | 4.08985466  |
| 6 | 3.27457886  | 1.36836857  | -0.40304594 | 9 | 5.2648135   | 2.06014837  | 3.02780002  |
| 6 | 3.46460489  | 1.14202263  | 0.96413673  | 9 | 4.57022026  | 3.970583    | 2.20366968  |
| 6 | 3.50272195  | -0.18624273 | 1.45278577  | 6 | -4.34753635 | -0.70872612 | 3.78929625  |
| 6 | 2.89447289  | -0.24882564 | 2.75970404  | 9 | -4.21477088 | 0.12083504  | 4.85953896  |
| 6 | 2.19147018  | -1.37668335 | 3.17310538  | 9 | -5.52674945 | -0.41871867 | 3.19506089  |
| 6 | 0.92932992  | -1.19939505 | 3.84249365  | 9 | -4.41337398 | -1.98168229 | 4.25565352  |
| 6 | 0.07265867  | -2.27489659 | 3.41754049  | 6 | 4.13189279  | 3.65196377  | -1.185325   |
| 6 | -1.28304953 | -2.01902047 | 3.24676196  | 9 | 3.79000867  | 4.96029325  | -1.30703459 |
| 6 | -1.99288886 | -2.51664378 | 2.09027276  | 9 | 5.12134104  | 3.55837818  | -0.27061538 |
| 6 | -3.00279861 | -1.60052801 | 1.70859205  | 9 | 4.65243153  | 3.24724778  | -2.3727077  |
| 6 | -3.30250796 | -1.41041314 | 0.35765834  | 6 | -5.67902082 | -0.40954748 | 0.01282252  |
| 6 | -4.1174254  | -0.16195681 | 0.00009319  | 9 | -6.0187222  | -1.49090622 | 0.75188441  |
| 6 | -3.68222169 | 0.41497669  | -1.34806582 | 9 | -6.33490243 | 0.66927048  | 0.51475103  |
| 6 | -3.00958455 | -0.30994411 | -2.29969326 | 9 | -6.15516073 | -0.61373175 | -1.24064079 |
| 6 | -2.08930209 | 0.35262957  | -3.17485116 | 6 | 3.70220387  | 0.35270744  | -3.85286382 |
| 6 | -1.90732027 | 1.73890015  | -3.13774231 | 9 | 3.92144011  | 1.57954754  | -4.39155719 |
| 6 | -0.57533012 | 2.30038352  | -3.29175557 | 9 | 4.88683299  | -0.08994949 | -3.37134497 |
| 6 | 0.5223885   | 1.45405857  | -3.48080594 | 9 | 3.32714691  | -0.45745591 | -4.87558874 |
| 6 | 1.78487964  | 1.70984168  | -2.85872573 | 6 | -3.52469634 | -2.69748639 | -2.95746379 |
| 6 | 2.58284052  | 0.41084499  | -2.72801464 | 9 | -4.81209137 | -2.58455974 | -2.5467841  |
| 6 | 3.13012798  | 0.24846903  | -1.30681643 | 9 | -3.47620536 | -2.36031471 | -4.27247916 |
| 6 | 3.17501541  | -1.05200134 | -0.80274621 | 9 | -3.18107663 | -4.00131057 | -2.85143444 |
| 6 | 3.3644541   | -1.27223101 | 0.5804159   | 6 | 3.42414056  | -3.23416204 | -2.1903478  |
| 6 | 2.6558991   | -2.45840671 | 1.00567577  | 9 | 3.93471276  | -2.64289925 | -3.2937039  |
| 6 | 2.09332499  | -2.52368873 | 2.2862864   | 9 | 4.46571083  | -3.61635839 | -1.40593688 |
| 6 | 0.78148564  | -3.07804476 | 2.43695427  | 9 | 2.77377096  | -4.35427945 | -2.59329644 |
| 6 | 0.10763914  | -3.54405785 | 1.30143917  | 6 | -0.48677838 | -4.93333139 | -1.7318765  |
| 6 | -1.29544231 | -3.24817179 | 1.12096875  | 9 | -1.54116084 | -5.60418067 | -1.20104159 |
| 6 | -1.58957187 | -3.06708003 | -0.25029483 | 9 | -0.64672895 | -4.8812155  | -3.07364464 |
| 6 | -2.57715908 | -2.1633581  | -0.64058216 | 9 | 0.61739064  | -5.68703583 | -1.49096303 |
| 6 | -2.59432722 | -1.77268113 | -2.11662091 | 8 | 0.49385936  | 3.32780101  | 4.78114847  |
| 6 | -1.13544805 | -1.72737227 | -2.65181743 | 8 | -1.46896127 | 1.58364753  | 3.83307792  |
| 6 | -0.95262801 | -0.51796936 | -3.36147194 |   |             |             |             |
| 6 | 0.33042899  | 0.02317682  | -3.51233153 |   |             |             |             |
| 6 | 1.44868266  | -0.63342982 | -2.94986896 |   |             |             |             |
| 6 | 1.28196429  | -1.83118486 | -2.258132   |   |             |             |             |
| 6 | 2.46114944  | -2.29325945 | -1.4069241  |   |             |             |             |

## References:

- (1) Gracheva, S. V.; Yankova, T. S.; Kosaya, M. P.; Brotsman, V. A.; Ioffe, I. N.; Lukonina, N. S.; Goryunkov, A. A. Reversibly Switchable Methanofullerene by Photoexcitation and Reduction. *Phys. Chem. Chem. Phys.* **2022**, *24* (4), 26998–27003. <https://doi.org/10.1039/D2CP03945A>.
- (2) Belov, N. M.; Apenova, M. G.; Rybalchenko, A. V.; Borkovskaya, E. V.; Lukonina, N. S.; Goryunkov, A. A.; Ioffe, I. N.; Troyanov, S. I.; Sidorov, L. N. Transalkylation of Higher Trifluoromethylated Fullerenes with C70: A Pathway to New Addition Patterns of C70(CF3)8. *Chem. Eur. J.* **2014**, *20*, 1126–1133. <https://doi.org/10.1002/chem.201302480>.
- (3) SAINT, Version 8.40B; Bruker AXS Inc.: Madison, Wisconsin, USA, 2017.
- (4) Krause, L.; Herbst-Irmer, R.; Sheldrick, G. M.; Stalke, D. Comparison of Silver and Molybdenum Microfocus X-Ray Sources for Single-Crystal Structure Determination. *J Appl Crystallogr* **2015**, *48* (1), 3–10. <https://doi.org/10.1107/S1600576714022985>.
- (5) Sheldrick, G. M. SHELX-2018/3, Program Package for Crystal Structure Solution and Refinement, Göttingen, Germany, 2018.
- (6) Spek, A. L. PLATON SQUEEZE: A Tool for the Calculation of the Disordered Solvent Contribution to the Calculated Structure Factors. *Acta Crystallogr C Struct Chem* **2015**, *71* (1), 9–18. <https://doi.org/10.1107/S2053229614024929>.
- (7) Brouwer, A. M. Standards for Photoluminescence Quantum Yield Measurements in Solution (IUPAC Technical Report). *Pure and Applied Chemistry* **2011**, *83* (12), 2213–2228. <https://doi.org/10.1351/PAC-REP-10-09-31>.
- (8) Würth, C.; Grabolle, M.; Pauli, J.; Spieles, M.; Resch-Genger, U. Relative and Absolute Determination of Fluorescence Quantum Yields of Transparent Samples. *Nature Protocols* **2013**, *8* (8), 1535–1550. <https://doi.org/10.1038/nprot.2013.087>.
- (9) Resch-Genger, U.; Rurack, K. Determination of the Photoluminescence Quantum Yield of Dilute Dye Solutions (IUPAC Technical Report). *Pure and Applied Chemistry* **2013**, *85* (10), 2005–2013. <https://doi.org/10.1351/pac-rep-12-03-03>.
- (10) Laikov, D. N. Fast Evaluation of Density Functional Exchange-Correlation Terms Using the Expansion of the Electron Density in Auxiliary Basis Sets. *Chem. Phys. Lett.* **1997**, *281*, 151–156. [https://doi.org/10.1016/S0009-2614\(97\)01206-2](https://doi.org/10.1016/S0009-2614(97)01206-2).
- (11) Perdew, J. P.; Burke, K.; Ernzerhof, M. Generalized Gradient Approximation Made Simple. *Phys. Rev. Lett.* **1996**, *77*, 3865–3868. <https://doi.org/10.1103/PhysRevLett.77.3865>.
- (12) Neese, F. The ORCA Program System. *Wiley Interdisciplinary Reviews: Computational Molecular Science* **2012**, *2* (1), 73–78. <https://doi.org/10.1002/wcms.81>.
